# Supplementary material for: Inferring functional transcription factor-gene binding pairs by integrating transcription factor binding data with transcription factor knockout data
Source: BMC Syst Biol. 2013 Dec 13;7(Suppl 6):S13. doi: 10.1186/1752-0509-7-S6-S13 (PMC4029220; doi:10.1186/1752-0509-7-S6-S13)
Supplement: Additional file 1 — Percentage of functional binding targets. Additional file 1 contains the table showing the percentages of functional binding target genes of TFs with available TFKO data. In the table, the number of binding targets specified in the original binding data and the number of functional binding targets mined out by our method are shown. The percentage of functional target genes was calculated by the number of functional binding targets divided by the number of original binding targets. [file 1752-0509-7-S6-S13-S1.xls]

## Sheet: % of Functional Targets
TF	Number of Potential Binding Targets	Number of Extracted Functional Binding Targets	Percentage of Functional Binding Targets
Ndd1	185	1	0.0054
Pho2	141	1	0.0071
Gat3	176	2	0.0114
Cup9	84	1	0.0119
Ume1	81	1	0.0123
Arg80	80	1	0.0125
Iki1	65	1	0.0154
Hms1	57	1	0.0175
Cbf1	112	2	0.0179
Rgm1	106	2	0.0189
Hap5	47	1	0.0213
Sfl1	43	1	0.0233
Gat1	71	2	0.0282
Met31	69	2	0.029
Met32	153	5	0.0327
Aro80	91	3	0.033
Ash1	15	1	0.0667
Rfx1	104	7	0.0673
Tos8	49	5	0.102
Rlm1	120	17	0.1417
Ste12	130	24	0.1846
Bas1	89	17	0.191
Sum1	121	28	0.2314
Stp1	52	34	0.6538
Yrr1	157	103	0.6561
Ecm22	6	4	0.6667
Gcr2	91	61	0.6703
Stp2	61	41	0.6721
Pdr3	72	49	0.6806
Zap1	69	47	0.6812
Yhp1	92	63	0.6848
Adr1	144	99	0.6875
Arr1	65	46	0.7077
Hac1	49	35	0.7143
Ifh1	28	20	0.7143
Gal4	68	49	0.7206
Upc2	118	86	0.7288
Aft2	112	82	0.7321
Hsf1	96	71	0.7396
Yox1	111	83	0.7477
Haa1	8	6	0.75
Gln3	65	49	0.7538
Cst6	106	80	0.7547
Rtg3	71	54	0.7606
Rpn4	176	134	0.7614
Cad1	68	52	0.7647
Mga1	188	144	0.766
Mig2	77	59	0.7662
Stb5	103	79	0.767
Msn2	43	33	0.7674
Rim101	87	67	0.7701
Leu3	70	54	0.7714
Tec1	114	88	0.7719
Rsf2	49	38	0.7755
Rtg1	76	59	0.7763
Pho4	162	126	0.7778
Gcr1	63	50	0.7937
Rme1	107	85	0.7944
Pip2	111	89	0.8018
Rox1	172	138	0.8023
Aft1	69	56	0.8116
Fkh1	284	232	0.8169
Gcn4	143	117	0.8182
Mig1	88	72	0.8182
Abf1	547	449	0.8208
Oaf1	169	139	0.8225
Hap4	125	103	0.824
Pdr1	162	134	0.8272
Swi5	200	166	0.83
Azf1	96	80	0.8333
Skn7	163	136	0.8344
Ace2	145	121	0.8345
Msn4	145	121	0.8345
Fkh2	216	181	0.838
Xbp1	25	21	0.84
Ino2	114	96	0.8421
Met4	58	49	0.8448
Mbp1	227	192	0.8458
Spt2	89	76	0.8539
Opi1	29	25	0.8621
Mcm1	163	141	0.865
Sfp1	62	54	0.871
Sko1	93	81	0.871
Sut1	172	150	0.8721
Mig3	33	29	0.8788
Elp4	215	189	0.8791
Ino4	194	171	0.8814
Rap1	408	360	0.8824
Swi4	252	224	0.8889
Ume6	298	267	0.896
Nrg1	135	121	0.8963
Mot3	63	57	0.9048
Yap1	156	142	0.9103
Sok2	52	49	0.9423
Fhl1	207	201	0.971
