# Supplementary material for: Inferring functional transcription factor-gene binding pairs by integrating transcription factor binding data with transcription factor knockout data
Source: BMC Syst Biol. 2013 Dec 13;7(Suppl 6):S13. doi: 10.1186/1752-0509-7-S6-S13 (PMC4029220; doi:10.1186/1752-0509-7-S6-S13)
Supplement: Additional file 2 — Functional TF-gene binding pairs. Additional file 2 contains the table of functional TF-gene binding pairs mined out by our method. The potential epistatic regulation cascades were also listed in the table for possible subsequent analysis. Note that epistatic regulation cascades of path length one refer to the directly curated TFKO evidence. [file 1752-0509-7-S6-S13-S2.xls]

## Sheet: Functional Binding Targets
TF	Functional binding target gene	Potential epistatic regulation cascade
Ecm22	YBR260C	ECM22 , AFT2 , CAD1 , SPT2 , MSN4 , RGD1
Ecm22	YBR263W	ECM22 , AFT2 , CAD1 , MET4 , SHM1
Ecm22	YAL008W	ECM22 , AFT2 , CAD1 , MET4 , FUN14
Ecm22	YFR050C	ECM22 , AFT2 , CAD1 , MET4 , YAP1 , PRE4
Yap1	YJL098W	YAP1 , SAP185
Yap1	YFL056C	YAP1 , AAD6
Yap1	YAL037W	YAP1 , YAL037W
Yap1	YLR109W	YAP1 , AHP1
Yap1	YFR017C	YAP1 , YFR017C
Yap1	YGR195W	YAP1 , SFP1 , SKI6
Yap1	YJL148W	YAP1 , RPA34
Yap1	YDR010C	YAP1 , AFT1 , YDR010C
Yap1	YJL101C	YAP1 , GSH1
Yap1	YJR122W	YAP1 , IBA57
Yap1	YAL003W	YAP1 , EFB1
Yap1	YOR273C	YAP1 , TPO4
Yap1	YBR200W	YAP1 , YOX1 , BEM1
Yap1	YHR048W	YAP1 , YHK8
Yap1	YOR018W	YAP1 , SFP1 , ROD1
Yap1	YLR302C	YAP1 , IFH1 , MET4 , YLR302C
Yap1	YNL087W	YAP1 , IFH1 , MET4 , TCB2
Yap1	YEL042W	YAP1 , MSN2 , GDA1
Yap1	YOL124C	YAP1 , TRM11
Yap1	YDR013W	YAP1 , PSF1
Yap1	YJL100W	YAP1 , SFP1 , LSB6
Yap1	YGR009C	YAP1 , SFP1 , SEC9
Yap1	YKR054C	YAP1 , SFP1 , DYN1
Yap1	YDL170W	YAP1 , SFP1 , UGA3
Yap1	YER078C	YAP1 , RAP1 , YER078C
Yap1	YDR259C	YAP1 , MSN2 , YAP6
Yap1	YGR194C	YAP1 , RPN4 , XKS1
Yap1	YDR165W	YAP1 , MSN2 , TRM82
Yap1	YKR071C	YAP1 , DRE2
Yap1	YOL123W	YAP1 , YRR1 , PDR3 , HRP1
Yap1	YDR132C	YAP1 , YDR132C
Yap1	YML116W	YAP1 , ATR1
Yap1	YOR315W	YAP1 , SFG1
Yap1	YDR316W-A	YAP1 , AFT1 , YDR316W-A
Yap1	YEL045C	YAP1 , YEL045C
Yap1	YOR044W	YAP1 , MSN2 , IRC23
Yap1	YPR065W	YAP1 , ROX1
Yap1	YMR038C	YAP1 , CCS1
Yap1	YNL025C	YAP1 , GIS2 , SSN8
Yap1	YGR060W	YAP1 , ERG25
Yap1	YBL087C	YAP1 , RPL23A
Yap1	YPL217C	YAP1 , SFP1 , BMS1
Yap1	YOL034W	YAP1 , SFP1 , SMC5
Yap1	YKL151C	YAP1 , YKL151C
Yap1	YOR163W	YAP1 , DDP1
Yap1	YBR068C	YAP1 , STP1 , BAP2
Yap1	YJR109C	YAP1 , CPA2
Yap1	YDL182W	YAP1 , LYS20
Yap1	YER044C	YAP1 , ERG28
Yap1	YER012W	YAP1 , PRE1
Yap1	YNL231C	YAP1 , STB5 , PDR16
Yap1	YDR225W	YAP1 , SFP1 , HTA1
Yap1	YNL134C	YAP1 , YNL134C
Yap1	YNR061C	YAP1 , MGA1 , YNR061C
Yap1	YBL032W	YAP1 , HEK2
Yap1	YLL024C	YAP1 , SSA2
Yap1	YDL020C	YAP1 , RPN4
Yap1	YPL111W	YAP1 , CAR1
Yap1	YGR011W	YAP1 , YGR011W
Yap1	YBR190W	YAP1 , YBR190W
Yap1	YML028W	YAP1 , TSA1
Yap1	YLR367W	YAP1 , SFP1 , RPS22B
Yap1	YDR011W	YAP1 , SNQ2
Yap1	YFL057C	YAP1 , AAD16
Yap1	YNR018W	YAP1 , YNR018W
Yap1	YPL216W	YAP1 , YOX1 , HMS1 , YPL216W
Yap1	YDL133W	YAP1 , SFP1 , YDL133W
Yap1	YKL150W	YAP1 , AFT1 , MCR1
Yap1	YDL017W	YAP1 , CDC7
Yap1	YOL118C	YAP1 , YOL118C
Yap1	YDL018C	YAP1 , YOX1 , SWI4 , ERP3
Yap1	YDR308C	YAP1 , MSN2 , SRB7
Yap1	YOR128C	YAP1 , AFT1 , ADE2
Yap1	YGR192C	YAP1 , TDH3
Yap1	YGR027C	YAP1 , RPS25A
Yap1	YJL048C	YAP1 , AFT1 , UBX6
Yap1	YGR010W	YAP1 , NMA2
Yap1	YBR191W	YAP1 , RPL21A
Yap1	YOR180C	YAP1 , MGA1 , DCI1
Yap1	YEL044W	YAP1 , IES6
Yap1	YLL058W	YAP1 , SFP1 , YLL058W
Yap1	YBL018C	YAP1 , POP8
Yap1	YMR144W	YAP1 , SFP1 , YMR144W
Yap1	YOL151W	YAP1 , GRE2
Yap1	YOR075W	YAP1 , SFP1 , UFE1
Yap1	YOR181W	YAP1 , SFP1 , LAS17
Yap1	YPL044C	YAP1 , IFH1 , MET4 , YPL044C
Yap1	YEL046C	YAP1 , GLY1
Yap1	YLR075W	YAP1 , RPL10
Yap1	YDR059C	YAP1 , AFT1 , UBC5
Yap1	YJR123W	YAP1 , RPS5
Yap1	YOR074C	YAP1 , RPN10 , CDC21
Yap1	YFR023W	YAP1 , SFP1 , PES4
Yap1	YAL005C	YAP1 , SSA1
Yap1	YOR162C	YAP1 , YRR1
Yap1	YDR261C	YAP1 , RLM1 , EXG2
Yap1	YGL135W	YAP1 , RPL1B
Yap1	YDL183C	YAP1 , YRR1 , YDL183C
Yap1	YOR043W	YAP1 , IFH1 , MET4 , WHI2
Yap1	YOR274W	YAP1 , HAC1 , MOD5
Yap1	YKL071W	YAP1 , YKL071W
Yap1	YBL033C	YAP1 , RIB1
Yap1	YOL117W	YAP1 , RRI2
Yap1	YGR191W	YAP1 , HIP1
Yap1	YLR460C	YAP1 , YLR460C
Yap1	YGL136C	YAP1 , AFT1 , MRM2
Yap1	YLR074C	YAP1 , MSN2 , BUD20
Yap1	YKR058W	YAP1 , GLG1
Yap1	YDR224C	YAP1 , AFT1 , CAT8 , HTB1
Yap1	YLR108C	YAP1 , YLR108C
Yap1	YDR501W	YAP1 , PLM2
Yap1	YGR162W	YAP1 , TIF4631
Yap1	YLR369W	YAP1 , IFH1 , MET4 , SSQ1
Yap1	YJL060W	YAP1 , BNA3
Yap1	YDL171C	YAP1 , GLT1
Yap1	YJR105W	YAP1 , ADO1
Yap1	YOL119C	YAP1 , MCH4
Yap1	YER079W	YAP1 , YER079W
Yap1	YKR076W	YAP1 , ECM4
Yap1	YHR179W	YAP1 , OYE2
Yap1	YML131W	YAP1 , YML131W
Yap1	YGR234W	YAP1 , YHB1
Yap1	YFL034W	YAP1 , YFL034W
Yap1	YJR110W	YAP1 , HAP4 , GCN4 , YMR1
Yap1	YER138C	YAP1 , YER138C
Yap1	YLL063C	YAP1 , AYT1
Yap1	YDL179W	YAP1 , SWI5 , PCL9
Yap1	YLR439W	YAP1 , MRPL4
Yap1	YJR104C	YAP1 , SOD1
Yap1	YKR052C	YAP1 , MRS4
Yap1	YDR533C	YAP1 , HSP31
Yap1	YOR236W	YAP1 , HAC1 , DFR1
Yap1	YDR060W	YAP1 , MAK21
Yap1	YLL059C	YAP1 , SFP1 , GLN3 , YLL059C
Yap1	YDR500C	YAP1 , RPL37B
Yap1	YMR037C	YAP1 , MSN2
Yap1	YOL115W	YAP1 , PAP2
Yap1	YLL060C	YAP1 , GTT2
Yap1	YJL095W	YAP1 , HAP4 , GCN4 , LEU3 , BCK1
Yap1	YDL013W	YAP1 , YOX1 , SWI4 , SLX5
Yap1	YML130C	YAP1 , ERO1
Yap1	YGL202W	YAP1 , ARO8
Leu3	YEL055C	LEU3 , AFT1 , POL5
Leu3	YGR191W	LEU3 , HAP4 , HIP1
Leu3	YHR208W	LEU3 , AFT1 , BAT1
Leu3	YMR194W	LEU3 , RPL36A
Leu3	YOR271C	LEU3 , FSF1
Leu3	YAL028W	LEU3 , GIS1 , FRT2
Leu3	YBR068C	LEU3 , MSN4 , RPN4 , YAP1 , STP1 , BAP2
Leu3	YKL120W	LEU3 , ADR1 , OAC1
Leu3	YDR131C	LEU3 , TEC1 , SFP1 , YAP1 , YDR131C
Leu3	YER137C	LEU3 , YER137C
Leu3	YPL198W	LEU3 , AFT1 , GCR1 , RPL7B
Leu3	YHL034C	LEU3 , MSN4 , SBP1
Leu3	YNL103W	LEU3 , AFT1 , CAD1 , MET4
Leu3	YMR108W	LEU3 , HAP4 , GCN4 , ILV2
Leu3	YBR048W	LEU3 , AFT1 , GCR1 , RPS11B
Leu3	YDR278C	LEU3 , TEC1 , SFP1 , YAP1 , YDR278C
Leu3	YOR227W	LEU3 , MSN4 , MSN2 , HER1
Leu3	YKL172W	LEU3 , MSN4 , MSN2 , EBP2
Leu3	YER189W	LEU3 , TEC1 , SFP1 , YAP1 , YER189W
Leu3	YCR019W	LEU3 , TEC1 , SFP1 , MAK32
Leu3	YJL191W	LEU3 , RPS14B
Leu3	YGL135W	LEU3 , AFT1 , GCR1 , RPL1B
Leu3	YLR356W	LEU3 , YLR356W
Leu3	YER073W	LEU3 , MSN4 , ALD5
Leu3	YGR256W	LEU3 , AFT1 , GND2
Leu3	YLR354C	LEU3 , TEC1 , SFP1 , TAL1
Leu3	YNL104C	LEU3 , SOK2 , LEU4
Leu3	YJL139C	LEU3 , YUR1
Leu3	YDR064W	LEU3 , HAP4 , GCN4 , RPS13
Leu3	YGL009C	LEU3 , LEU1
Leu3	YLR368W	LEU3 , TEC1 , SFP1 , ARR1 , MDM30
Leu3	YAL029C	LEU3 , HAP4 , MYO4
Leu3	YCR024C-A	LEU3 , PMP1
Leu3	YOR236W	LEU3 , MSN4 , HAC1 , DFR1
Leu3	YJL148W	LEU3 , TEC1 , SFP1 , RPA34
Leu3	YLR367W	LEU3 , MSN4 , RPS22B
Leu3	YOR369C	LEU3 , MSN4 , RPS12
Leu3	YGL001C	LEU3 , AFT1 , ERG26
Leu3	YGR221C	LEU3 , TEC1 , SFP1 , TOS2
Leu3	YLR355C	LEU3 , SOK2 , ILV5
Leu3	YDR042C	LEU3 , GIS1 , YDR042C
Leu3	YKL118W	LEU3 , TEC1 , SFP1 , YAP1 , YKL118W
Leu3	YOR108W	LEU3 , LEU9
Leu3	YGR255C	LEU3 , MSN4 , COQ6
Leu3	YGL136C	LEU3 , AFT1 , MRM2
Leu3	YHR207C	LEU3 , PHO4 , SET5
Leu3	YOL121C	LEU3 , AFT1 , GCR1 , RPS19A
Leu3	YAR009C	LEU3 , AFT1 , GCR1 , YAR009C
Leu3	YNL102W	LEU3 , HAP4 , GCN4 , POL1
Leu3	YMR193W	LEU3 , TEC1 , SFP1 , ARR1 , MRPL24
Leu3	YNR050C	LEU3 , AFT1 , LYS9
Leu3	YOR226C	LEU3 , AFT1 , ISU2
Leu3	YER072W	LEU3 , ADR1 , VTC1
Leu3	YMR014W	LEU3 , MSN4 , MSN2 , BUD22
Met4	YGR060W	MET4 , UPC2 , ERG25
Met4	YNL016W	MET4 , YAP1 , PUB1
Met4	YIR018W	MET4 , AFT1 , YAP5
Met4	YNL097C	MET4 , YAP1 , PHO23
Met4	YDL059C	MET4 , RAD59
Met4	YGR204W	MET4 , ADE3
Met4	YIL074C	MET4 , SER33
Met4	YGL184C	MET4 , STR3
Met4	YLR432W	MET4 , SFP1 , IMD3
Met4	YDL058W	MET4 , USO1
Met4	YPL198W	MET4 , RPL7B
Met4	YBR078W	MET4 , ECM33
Met4	YLL039C	MET4 , UBI4
Met4	YNL034W	MET4 , AFT1 , YNL034W
Met4	YFR031C	MET4 , SFP1 , HSF1 , SMC2
Met4	YJL212C	MET4 , OPT1
Met4	YFR035C	MET4 , AFT1 , HAP4 , GCN4 , LEU3 , YFR035C
Met4	YKL001C	MET4 , MET14
Met4	YNL221C	MET4 , AFT1 , HAP4 , GCN4 , POP1
Met4	YLL046C	MET4 , SFP1 , ARR1 , RNP1
Met4	YER092W	MET4 , IES5
Met4	YNL030W	MET4 , YAP1 , HHF2
Met4	YDL024C	MET4 , DIA3
Met4	YLR179C	MET4 , YLR179C
Met4	YLR092W	MET4 , SUL2
Met4	YJL100W	MET4 , LSB6
Met4	YHR136C	MET4 , SPL2
Met4	YJL078C	MET4 , ACE2 , PRY3
Met4	YJL210W	MET4 , NRG1 , PEX2
Met4	YJL048C	MET4 , UBX6
Met4	YFR030W	MET4 , MET10
Met4	YKR073C	MET4 , STP2 , YKR073C
Met4	YLR214W	MET4 , HAC1 , FRE1
Met4	YOR236W	MET4 , XBP1 , DFR1
Met4	YLR213C	MET4 , RPN4 , CRR1
Met4	YIR017C	MET4 , MET28
Met4	YMR070W	MET4 , SFP1 , MOT3
Met4	YGR055W	MET4 , YAP1 , MUP1
Met4	YBR011C	MET4 , CUP2 , IPP1
Met4	YPL164C	MET4 , SFP1 , ADR1 , MLH3
Met4	YNL031C	MET4 , YAP1 , HHT2
Met4	YOR136W	MET4 , AFT1 , IDH2
Met4	YJL101C	MET4 , GSH1
Met4	YLR180W	MET4 , YAP1 , SAM1
Met4	YGR157W	MET4 , YAP1 , CHO2
Met4	YGR239C	MET4 , SFP1 , PEX21
Met4	YHR137W	MET4 , YAP1 , ARO9
Met4	YNL220W	MET4 , YAP1 , ADE12
Met4	YNL277W	MET4 , MET2
Upc2	YDR287W	UPC2 , NRG1 , RSF2 , HAP4 , GCN4 , STP2 , INM2
Upc2	YJR012C	UPC2 , MIG3 , MIG1 , GAL4 , MGA1 , MSN4 , YJR012C
Upc2	YDR405W	UPC2 , MIG3 , MIG1 , ADR1 , TEC1 , SFP1 , MRP20
Upc2	YFR007W	UPC2 , NRG1 , XBP1 , YRR1 , YAP1 , GIS2 , YFH7
Upc2	YGR200C	UPC2 , NRG1 , XBP1 , YRR1 , PDR3 , ELP2
Upc2	YCR005C	UPC2 , HMS1 , CIT2
Upc2	YNL012W	UPC2 , MIG3 , MIG1 , ADR1 , SPO1
Upc2	YDR372C	UPC2 , NRG1 , XBP1 , YRR1 , YAP1 , IFH1 , VPS74
Upc2	YJR102C	UPC2 , NRG1 , RSF2 , HAP4 , GCN4 , STP2 , VPS25
Upc2	YDR179C	UPC2 , NRG1 , XBP1 , YRR1 , CSN9
Upc2	YLL014W	UPC2 , MIG3 , MIG1 , ADR1 , TEC1 , SFP1 , YLL014W
Upc2	YFR041C	UPC2 , NRG1 , RSF2 , HAP4 , GCN4 , GLN3 , ERJ5
Upc2	YOR309C	UPC2 , NRG1 , XBP1 , YRR1 , YAP1 , YOR309C
Upc2	YJR103W	UPC2 , NRG1 , XBP1 , YRR1 , YAP1 , URA8
Upc2	YJR098C	UPC2 , MIG3 , MIG1 , ADR1 , TEC1 , SFP1 , YJR098C
Upc2	YJR099W	UPC2 , MIG3 , MIG1 , ADR1 , PIP2 , RSC30 , YUH1
Upc2	YDR373W	UPC2 , NRG1 , XBP1 , YRR1 , YAP1 , FRQ1
Upc2	YBR110W	UPC2 , NRG1 , RSF2 , HAP4 , GCN4 , ALG1
Upc2	YCL008C	UPC2 , NRG1 , RSF2 , HAP4 , GCN4 , STP22
Upc2	YKL077W	UPC2 , NRG1 , XBP1 , YRR1 , YAP1 , YKL077W
Upc2	YGR126W	UPC2 , NRG1 , XBP1 , YRR1 , RPN4 , YGR126W
Upc2	YJR132W	UPC2 , MIG3 , MIG1 , ADR1 , NMD5
Upc2	YGR187C	UPC2 , NRG1 , RSF2 , HAP4 , GCN4 , MET4 , HGH1
Upc2	YCR012W	UPC2 , MIG3 , MIG1 , CAT8 , PGK1
Upc2	YMR052W	UPC2 , NRG1 , XBP1 , YRR1 , YAP1 , FAR3
Upc2	YDR370C	UPC2 , MIG3 , MIG1 , ADR1 , TEC1 , SFP1 , YDR370C
Upc2	YNR011C	UPC2 , MIG3 , MIG1 , ADR1 , TEC1 , SFP1 , PRP2
Upc2	YER044C	UPC2 , NRG1 , XBP1 , YRR1 , YAP1 , ERG28
Upc2	YOL102C	UPC2 , NRG1 , RSF2 , HAP4 , GCN4 , TPT1
Upc2	YER068W	UPC2 , NRG1 , XBP1 , YRR1 , YAP1 , MOT2
Upc2	YBR159W	UPC2 , MIG3 , MIG1 , ADR1 , YBR159W
Upc2	YPR122W	UPC2 , NRG1 , XBP1 , YRR1 , RPN4 , AXL1
Upc2	YHR171W	UPC2 , MIG3 , MIG1 , GAL4 , MGA1 , ATG7
Upc2	YDR404C	UPC2 , MIG3 , MIG1 , ADR1 , TEC1 , SFP1 , RPB7
Upc2	YJR108W	UPC2 , NRG1 , RSF2 , HAP4 , GCN4 , ABM1
Upc2	YDR286C	UPC2 , NRG1 , YDR286C
Upc2	YDR179W-A	UPC2 , NRG1 , RSF2 , HAP4 , GCN4 , YDR179W-A
Upc2	YGR188C	UPC2 , MIG3 , MIG1 , ADR1 , BUB1
Upc2	YMR193W	UPC2 , MIG3 , MIG1 , ADR1 , TEC1 , SFP1 , ARR1 , MRPL24
Upc2	YNL258C	UPC2 , NRG1 , RSF2 , HAP4 , GCN4 , DSL1
Upc2	YDL092W	UPC2 , NRG1 , XBP1 , YRR1 , YAP1 , HAC1 , SRP14
Upc2	YOR368W	UPC2 , MIG3 , MIG1 , ADR1 , TEC1 , SFP1 , RAD17
Upc2	YOR210W	UPC2 , NRG1 , RSF2 , HAP4 , GCN4 , RPB10
Upc2	YIL048W	UPC2 , MIG3 , MIG1 , ADR1 , PIP2 , SPS18 , NEO1
Upc2	YJR154W	UPC2 , NRG1 , XBP1 , YRR1 , PDR3 , YJR154W
Upc2	YDR075W	UPC2 , MIG3 , MIG1 , ADR1 , TEC1 , SFP1 , PPH3
Upc2	YDR045C	UPC2 , MIG3 , MIG1 , ADR1 , TEC1 , SFP1 , RPC11
Upc2	YPL113C	UPC2 , NRG1 , YPL113C
Upc2	YOR115C	UPC2 , MIG3 , MIG1 , CAT8 , TRS33
Upc2	YCL002C	UPC2 , NRG1 , XBP1 , YRR1 , YAP1 , AFT1 , CAD1 , YCL002C
Upc2	YOL049W	UPC2 , NRG1 , XBP1 , YRR1 , YAP1 , GSH2
Upc2	YBR109C	UPC2 , NRG1 , RSF2 , HAP4 , GCN4 , MET4 , CMD1
Upc2	YJL094C	UPC2 , NRG1 , RSF2 , HAP4 , GCN4 , KHA1
Upc2	YPL208W	UPC2 , NRG1 , XBP1 , YRR1 , YAP1 , RKM1
Upc2	YGL116W	UPC2 , NRG1 , RSF2 , HAP4 , YOX1 , CDC20
Upc2	YLR446W	UPC2 , NRG1 , XBP1 , YRR1 , RPN4 , YLR446W
Upc2	YCL009C	UPC2 , NRG1 , RSF2 , HAP4 , GCN4 , ILV6
Upc2	YOR310C	UPC2 , NRG1 , XBP1 , YRR1 , YAP1 , NOP58
Upc2	YIL139C	UPC2 , NRG1 , RSF2 , HAP4 , YOX1 , SWI4 , REV7
Upc2	YCR008W	UPC2 , NRG1 , XBP1 , YRR1 , YAP1 , SAT4
Upc2	YCR032W	UPC2 , NRG1 , XBP1 , YRR1 , RPN4 , BPH1
Upc2	YOL024W	UPC2 , NRG1 , RSF2 , HAP4 , YOL024W
Upc2	YPL209C	UPC2 , NRG1 , RSF2 , HAP4 , GCN4 , IPL1
Upc2	YNR012W	UPC2 , NRG1 , XBP1 , YRR1 , PDR3 , URK1
Upc2	YAR009C	UPC2 , NRG1 , XBP1 , YRR1 , YAP1 , YAR009C
Upc2	YNL076W	UPC2 , MIG3 , MIG1 , ADR1 , TEC1 , SFP1 , ARR1 , MKS1
Upc2	YDR080W	UPC2 , NRG1 , RSF2 , HAP4 , GCN4 , VPS41
Upc2	YOR265W	UPC2 , RBL2
Upc2	YDR057W	UPC2 , NRG1 , XBP1 , YRR1 , YAP1 , YOS9
Upc2	YFR042W	UPC2 , NRG1 , RSF2 , HAP4 , GCN4 , KEG1
Upc2	YLR097C	UPC2 , MIG3 , MIG1 , ADR1 , TEC1 , SFP1 , HRT3
Upc2	YOR209C	UPC2 , NRG1 , XBP1 , YRR1 , YAP1 , NPT1
Upc2	YOR365C	UPC2 , NRG1 , XBP1 , YRR1 , YAP1 , RAP1 , YOR365C
Upc2	YER138C	UPC2 , NRG1 , XBP1 , YRR1 , YAP1 , YER138C
Upc2	YNL284C	UPC2 , NRG1 , RSF2 , HAP4 , GCN4 , MET4 , MRPL10
Upc2	YCR004C	UPC2 , MIG3 , MIG1 , ADR1 , YCP4
Upc2	YDL179W	UPC2 , MIG3 , MIG1 , ADR1 , PIP2 , PCL9
Upc2	YER066C-A	UPC2 , MIG3 , MIG1 , ADR1 , PDR1 , YER066C-A
Upc2	YDR056C	UPC2 , NRG1 , XBP1 , YRR1 , YAP1 , AFT1 , YDR056C
Upc2	YHR209W	UPC2 , HMS1 , CRG1
Upc2	YCR006C	UPC2 , NRG1 , XBP1 , YRR1 , YAP1 , YCR006C
Upc2	YDL013W	UPC2 , NRG1 , RSF2 , HAP4 , YOX1 , SWI4 , SLX5
Upc2	YNR054C	UPC2 , NRG1 , RSF2 , HAP4 , GCN4 , GLN3 , ESF2
Upc2	YDR294C	UPC2 , MIG3 , MIG1 , ADR1 , DPL1
Upc2	YOR367W	UPC2 , NRG1 , XBP1 , YRR1 , YAP1 , RAP1 , SCP1
Upc2	YDR183W	UPC2 , MIG3 , MIG1 , ADR1 , TEC1 , SFP1 , PLP1
Skn7	YML007W	SKN7 , YAP1
Skn7	YMR165C	SKN7 , ROX1 , ADR1 , PAH1
Skn7	YNL173C	SKN7 , YAP1 , MDG1
Skn7	YDR154C	SKN7 , YAP1 , YDR154C
Skn7	YDR010C	SKN7 , YAP1 , AFT1 , YDR010C
Skn7	YGR140W	SKN7 , YAP1 , CBF2
Skn7	YPR159W	SKN7 , MSN4 , KRE6
Skn7	YJL115W	SKN7 , MSN4 , PHO4 , ASF1
Skn7	YNL103W	SKN7 , YAP1 , IFH1 , MET4
Skn7	YDR186C	SKN7 , YAP1 , RAP1 , YDR186C
Skn7	YER011W	SKN7 , RME1 , TIR1
Skn7	YMR306W	SKN7 , YAP1 , AFT1 , FKS3
Skn7	YDL137W	SKN7 , YAP1 , SFP1 , ARF2
Skn7	YBL027W	SKN7 , YAP1 , RPL19B
Skn7	YOL060C	SKN7 , YAP1 , RAP1 , MAM3
Skn7	YKL096W-A	SKN7 , CWP2
Skn7	YML089C	SKN7 , ROX1 , ADR1 , YML089C
Skn7	YBR157C	SKN7 , ICS2
Skn7	YJL116C	SKN7 , NCA3
Skn7	YDR155C	SKN7 , CPR1
Skn7	YJL148W	SKN7 , YAP1 , RPA34
Skn7	YDL047W	SKN7 , YAP1 , SFP1 , SIT4
Skn7	YLR206W	SKN7 , YAP1 , ENT2
Skn7	YFL021W	SKN7 , YAP1 , GAT1
Skn7	YOR315W	SKN7 , SFG1
Skn7	YLR205C	SKN7 , YAP1 , HMX1
Skn7	YPL024W	SKN7 , YAP1 , SFP1 , RMI1
Skn7	YPR065W	SKN7 , ROX1
Skn7	YMR172C-A	SKN7 , YAP1 , YMR172C-A
Skn7	YOR348C	SKN7 , PUT4
Skn7	YGR060W	SKN7 , YAP1 , ERG25
Skn7	YOR098C	SKN7 , YAP1 , SFP1 , HSF1 , NUP1
Skn7	YDR061W	SKN7 , YAP1 , IFH1 , YDR061W
Skn7	YGL055W	SKN7 , YAP1 , OLE1
Skn7	YMR173W	SKN7 , DDR48
Skn7	YEL045C	SKN7 , YAP1 , YEL045C
Skn7	YMR251W-A	SKN7 , HOR7
Skn7	YDR043C	SKN7 , NRG1
Skn7	YDR309C	SKN7 , YAP1 , RPN4 , GIC2
Skn7	YNL034W	SKN7 , RME1 , YNL034W
Skn7	YLR354C	SKN7 , TAL1
Skn7	YML091C	SKN7 , YAP1 , RPM2
Skn7	YIL099W	SKN7 , SGA1
Skn7	YPR013C	SKN7 , YAP1 , YPR013C
Skn7	YEL017C-A	SKN7 , YAP1 , MSN2 , PMP2
Skn7	YPR151C	SKN7 , SUE1
Skn7	YMR302C	SKN7 , YAP1 , SFP1 , YME2
Skn7	YPL230W	SKN7 , NRG1 , USV1
Skn7	YGR279C	SKN7 , YAP1 , RPN4 , SCW4
Skn7	YCR073C	SKN7 , YAP1 , SFP1 , SSK22
Skn7	YDR011W	SKN7 , YAP1 , SNQ2
Skn7	YMR172W	SKN7 , YAP1 , SFP1 , ARR1 , CDC14 , HOT1
Skn7	YGR249W	SKN7 , YAP1 , MGA1
Skn7	YOL059W	SKN7 , YAP1 , HAP4 , GPD2
Skn7	YOR099W	SKN7 , YAP1 , HAC1 , KTR1
Skn7	YGL056C	SKN7 , MSN4 , SDS23
Skn7	YNL172W	SKN7 , YAP1 , YOX1 , APC1
Skn7	YAR068W	SKN7 , TOS8 , YAR068W
Skn7	YEL017W	SKN7 , MSN4 , GTT3
Skn7	YLR372W	SKN7 , YAP1 , SUR4
Skn7	YIR020C	SKN7 , YAP1 , AFT1 , CAD1 , YIR020C
Skn7	YPR160W	SKN7 , YAP1 , GPH1
Skn7	YNL104C	SKN7 , YAP1 , LEU4
Skn7	YJL048C	SKN7 , YAP1 , AFT1 , UBX6
Skn7	YMR304C-A	SKN7 , YMR304C-A
Skn7	YMR018W	SKN7 , YAP1 , YOX1 , YMR018W
Skn7	YMR017W	SKN7 , ROX1 , ADR1 , SPO20
Skn7	YFL039C	SKN7 , YAP1 , ACT1
Skn7	YMR173W-A	SKN7 , YMR173W-A
Skn7	YMR252C	SKN7 , MSN4 , YMR252C
Skn7	YHR003C	SKN7 , YAP1 , SFP1 , YHR003C
Skn7	YJL105W	SKN7 , YAP1 , AFT1 , SET4
Skn7	YDR006C	SKN7 , YAP1 , HAP4 , GCN4 , LEU3 , SOK1
Skn7	YHL034C	SKN7 , MSN4 , SBP1
Skn7	YPR158C-C	SKN7 , YAP1 , RPN4 , YPR158C-C
Skn7	YGR088W	SKN7 , CTT1
Skn7	YML052W	SKN7 , YAP1 , SUR7
Skn7	YGR143W	SKN7 , YAP1 , RAP1 , SKN1
Skn7	YDR441C	SKN7 , YAP1 , MSN2 , APT2
Skn7	YDR158W	SKN7 , YAP1 , SFP1 , HOM2
Skn7	YML008C	SKN7 , ROX1 , ERG6
Skn7	YKR013W	SKN7 , YAP1 , PRY2
Skn7	YOR101W	SKN7 , YAP1 , SFP1 , RAS1
Skn7	YIL013C	SKN7 , NRG1 , PDR11
Skn7	YPR161C	SKN7 , YAP1 , SFP1 , ARR1 , SGV1
Skn7	YDR007W	SKN7 , YAP1 , SFP1 , TRP1
Skn7	YJL112W	SKN7 , YAP1 , MDV1
Skn7	YPR149W	SKN7 , MSN4 , NCE102
Skn7	YKR011C	SKN7 , MSN4 , YKR011C
Skn7	YKR042W	SKN7 , UTH1
Skn7	YPL090C	SKN7 , YAP1 , RPS6A
Skn7	YCR065W	SKN7 , YAP1 , YOX1 , SWI4 , HCM1
Skn7	YDR188W	SKN7 , YAP1 , HAP4 , GCN4 , CCT6
Skn7	YGL236C	SKN7 , YAP1 , SFP1 , MTO1
Skn7	YLR109W	SKN7 , AHP1
Skn7	YMR019W	SKN7 , YAP1 , SFP1 , STB4
Skn7	YOL052C-A	SKN7 , DDR2
Skn7	YKL097C	SKN7 , YAP1 , IFH1 , MET4 , YKL097C
Skn7	YER137C-A	SKN7 , YAP1 , MSN2 , YER137C-A
Skn7	YLR110C	SKN7 , YAP1 , SFP1 , CCW12
Skn7	YML053C	SKN7 , YAP1 , RAP1 , YML053C
Skn7	YGR260W	SKN7 , YAP1 , SFP1 , TNA1
Skn7	YMR135C	SKN7 , YAP1 , IFH1 , MET4 , GID8
Skn7	YOR108W	SKN7 , YAP1 , LEU9
Skn7	YKL062W	SKN7 , MSN4
Skn7	YMR305C	SKN7 , SCW10
Skn7	YKL109W	SKN7 , YAP1 , HAP4
Skn7	YDL049C	SKN7 , KNH1
Skn7	YMR199W	SKN7 , CLN1
Skn7	YGR032W	SKN7 , GSC2
Skn7	YOR349W	SKN7 , CIN1
Skn7	YLL020C	SKN7 , YAP1 , AFT1 , ZAP1 , YLL020C
Skn7	YEL044W	SKN7 , YAP1 , IES6
Skn7	YFL022C	SKN7 , YAP1 , FRS2
Skn7	YBL028C	SKN7 , YAP1 , YBL028C
Skn7	YGL125W	SKN7 , MET13
Skn7	YDR156W	SKN7 , ROX1 , RPA14
Skn7	YOR107W	SKN7 , RGS2
Skn7	YNL014W	SKN7 , YAP1 , HEF3
Skn7	YEL054C	SKN7 , YAP1 , RPL12A
Skn7	YGL234W	SKN7 , YAP1 , MSN2 , ADE5
Skn7	YLR399C	SKN7 , YAP1 , SFP1 , BDF1
Skn7	YMR136W	SKN7 , YAP1 , RPN4 , GAT2
Skn7	YDR524C	SKN7 , YAP1 , HAP4 , GCN4 , AGE1
Skn7	YDR157W	SKN7 , YAP1 , YDR157W
Skn7	YMR037C	SKN7 , YAP1 , MSN2
Skn7	YML088W	SKN7 , YAP1 , UFO1
Skn7	YBL029W	SKN7 , HMS1 , YBL029W
Skn7	YOR100C	SKN7 , NRG1 , CRC1
Skn7	YNL098C	SKN7 , YAP1 , MSN2 , RAS2
Skn7	YLL019C	SKN7 , YAP1 , KNS1
Skn7	YKR097W	SKN7 , TOS8 , PCK1
Skn7	YLR257W	SKN7 , YLR257W
Skn7	YDR044W	SKN7 , ROX1 , HEM13
Skn7	YLR407W	SKN7 , YAP1 , SFP1 , YLR407W
Skn7	YMR016C	SKN7 , YAP1 , HAP4 , GCN4 , LEU3 , SOK2
Haa1	YDR366C	HAA1 , MSN4 , RPN4 , YAP1 , AFT1 , YDR366C
Haa1	YNR025C	HAA1 , MSN4 , RPN4 , YNR025C
Haa1	YNL105W	HAA1 , MSN4 , RPN4 , KAR4 , YNL105W
Haa1	YHR087W	HAA1 , MCM1 , YHR087W
Haa1	YDR368W	HAA1 , MSN4 , RPN4 , YAP1 , YPR1
Haa1	YNR068C	HAA1 , MSN4 , RPN4 , YNR068C
Yhp1	YOR214C	YHP1 , RME1 , YOR214C
Yhp1	YOR059C	YHP1 , SWI4 , ADR1 , TEC1 , SFP1 , YOR059C
Yhp1	YDR190C	YHP1 , MGA1 , STE12 , RVB1
Yhp1	YBR248C	YHP1 , MGA1 , MSN4 , RPN4 , HIS7
Yhp1	YNR067C	YHP1 , ECM22 , SUT1 , DSE4
Yhp1	YJL037W	YHP1 , ECM22 , IRC18
Yhp1	YNL187W	YHP1 , SWI4 , ADR1 , TEC1 , SFP1 , STB5 , SWT21
Yhp1	YLR086W	YHP1 , RME1 , NRG1 , XBP1 , YRR1 , SMC4
Yhp1	YOR004W	YHP1 , MGA1 , MSN4 , MSN2 , UTP23
Yhp1	YLR312W-A	YHP1 , SWI4 , ADR1 , TEC1 , SFP1 , MRPL15
Yhp1	YMR106C	YHP1 , MGA1 , MSN4 , RPN4 , YKU80
Yhp1	YDL064W	YHP1 , MGA1 , MSN4 , MSN2 , UBC9
Yhp1	YDR191W	YHP1 , HST4
Yhp1	YHR028C	YHP1 , ECM22 , AFT2 , CAD1 , MET4 , DAP2
Yhp1	YMR283C	YHP1 , SWI4 , ADR1 , PIP2 , RIT1
Yhp1	YJL038C	YHP1 , SWI4 , LOH1
Yhp1	YPL159C	YHP1 , SWI4 , ADR1 , TEC1 , SFP1 , PET20
Yhp1	YER133W	YHP1 , MGA1 , MSN4 , GLC7
Yhp1	YMR198W	YHP1 , KAR4 , CIK1
Yhp1	YDR127W	YHP1 , MGA1 , MSN4 , ARO1
Yhp1	YJR010C-A	YHP1 , MGA1 , MSN4 , SPC1
Yhp1	YGR056W	YHP1 , SWI4 , ADR1 , TEC1 , SFP1 , RSC1
Yhp1	YIL075C	YHP1 , ECM22 , SUT1 , IFH1 , RPN2
Yhp1	YBR176W	YHP1 , RME1 , NRG1 , RSF2 , HAP4 , GCN4 , ECM31
Yhp1	YER013W	YHP1 , SWI4 , ADR1 , TEC1 , SFP1 , PRP22
Yhp1	YDL017W	YHP1 , MGA1 , MSN4 , RPN4 , YAP1 , CDC7
Yhp1	YDL018C	YHP1 , SWI4 , ERP3
Yhp1	YDR273W	YHP1 , MGA1 , MSN4 , DON1
Yhp1	YLR222C	YHP1 , SWI4 , ADR1 , UTP13
Yhp1	YLR312C	YHP1 , MGA1 , MSN4 , RPN4 , YLR312C
Yhp1	YGR150C	YHP1 , SWI4 , ADR1 , TEC1 , SFP1 , GLN3 , YGR150C
Yhp1	YKL161C	YHP1 , ECM22 , SUT1 , IFH1 , YKL161C
Yhp1	YDR118W	YHP1 , RME1 , MIG3 , MIG1 , APC4
Yhp1	YDL092W	YHP1 , MGA1 , MSN4 , SRP14
Yhp1	YER135C	YHP1 , SWI4 , ADR1 , TEC1 , SFP1 , GLN3 , YER135C
Yhp1	YIL048W	YHP1 , SWI4 , ADR1 , PIP2 , SPS18 , NEO1
Yhp1	YKL177W	YHP1 , SWI4 , ADR1 , TEC1 , SFP1 , YKL177W
Yhp1	YOR298W	YHP1 , ECM22 , AFT2 , CAD1 , MET4 , OAF1 , MUM3
Yhp1	YOR188W	YHP1 , RME1 , NRG1 , XBP1 , YRR1 , MSB1
Yhp1	YLR020C	YHP1 , MGA1 , STE12 , YEH2
Yhp1	YFR023W	YHP1 , SWI4 , ADR1 , TEC1 , GAT4 , PES4
Yhp1	YPL208W	YHP1 , MGA1 , MSN4 , RPN4 , YAP1 , RKM1
Yhp1	YEL032W	YHP1 , RME1 , NRG1 , RSF2 , HAP4 , GCN4 , MCM3
Yhp1	YAR018C	YHP1 , KIN3
Yhp1	YPL209C	YHP1 , SWI4 , ADR1 , TEC1 , SFP1 , IPL1
Yhp1	YNL211C	YHP1 , MGA1 , MSN4 , RPN4 , YAP1 , YNL211C
Yhp1	YAR009C	YHP1 , ECM22 , AFT2 , CAD1 , YAR009C
Yhp1	YDR080W	YHP1 , ECM22 , AFT2 , CAD1 , MET4 , VPS41
Yhp1	YER138C	YHP1 , MGA1 , MSN4 , RPN4 , YAP1 , YER138C
Yhp1	YLR275W	YHP1 , MGA1 , STE12 , SMD2
Yhp1	YNL210W	YHP1 , RME1 , IME1 , MER1
Yhp1	YGL138C	YHP1 , SWI4 , HAP5 , CAT8 , YGL138C
Yhp1	YGR092W	YHP1 , DBF2
Yhp1	YDR028C	YHP1 , MGA1 , MSN4 , RPN4 , REG1
Yhp1	YOR297C	YHP1 , ECM22 , AFT2 , CAD1 , TIM18
Yhp1	YDR117C	YHP1 , SWI4 , ADR1 , TEC1 , SFP1 , TMA64
Yhp1	YMR197C	YHP1 , MGA1 , MSN4 , MSN2 , VTI1
Yhp1	YHR062C	YHP1 , MGA1 , MSN4 , PHO4 , RPP1
Yhp1	YGL159W	YHP1 , SWI4 , ADR1 , TEC1 , SFP1 , ARR1 , YGL159W
Yhp1	YOL115W	YHP1 , SWI4 , ADR1 , PAP2
Yhp1	YPR047W	YHP1 , RME1 , NRG1 , RSF2 , HAP4 , GCN4 , RFX1 , MSF1
Yhp1	YOR148C	YHP1 , ECM22 , AFT2 , CAD1 , MET4 , OAF1 , SPP2
Yhp1	YMR270C	YHP1 , SWI4 , ADR1 , TEC1 , SFP1 , ARR1 , RRN9
Ifh1	YPR088C	IFH1 , MET4 , SFP1 , SRP54
Ifh1	YAR050W	IFH1 , MET4 , AFT1 , FLO1
Ifh1	YPR094W	IFH1 , MET4 , YAP1 , RDS3
Ifh1	YIL133C	IFH1 , MET4 , SFP1 , RPL16A
Ifh1	YKL072W	IFH1 , MET4 , SFP1 , STB6
Ifh1	YPR084W	IFH1 , MET4 , AFT1 , CAD1 , YPR084W
Ifh1	YJL208C	IFH1 , MET4 , SFP1 , NUC1
Ifh1	YER183C	IFH1 , MET4 , SFP1 , FAU1
Ifh1	YML073C	IFH1 , MET4 , RPL6A
Ifh1	YPR083W	IFH1 , MET4 , AFT1 , HAP4 , GCN4 , MDM36
Ifh1	YAL065C	IFH1 , MET4 , PDR1 , YAL065C
Ifh1	YPR089W	IFH1 , MET4 , SFP1 , YHP1 , ECM22 , YPR089W
Ifh1	YLR364W	IFH1 , MET4 , GRX8
Ifh1	YAL067C	IFH1 , MET4 , SEO1
Ifh1	YLR363C	IFH1 , MET4 , NMD4
Ifh1	YIR030C	IFH1 , MET4 , YAP1 , DCG1
Ifh1	YPR081C	IFH1 , MET4 , SFP1 , HSF1 , GRS2
Ifh1	YAL068C	IFH1 , MET4 , UPC2 , YAL068C
Ifh1	YBR232C	IFH1 , MET4 , PDR1 , YBR232C
Ifh1	YHR182W	IFH1 , MET4 , STP2 , YHR182W
Mig2	YHR005C-A	MIG2 , MIG1 , ADR1 , TEC1 , SFP1 , GLN3 , MRS11
Mig2	YER133W	MIG2 , MIG1 , GAL4 , MGA1 , MSN4 , GLC7
Mig2	YDR118W	MIG2 , APC4
Mig2	YDL092W	MIG2 , MIG1 , GAL4 , MGA1 , MSN4 , SRP14
Mig2	YBR110W	MIG2 , MIG1 , NRG1 , RSF2 , HAP4 , GCN4 , ALG1
Mig2	YOR214C	MIG2 , MIG1 , ADR1 , TEC1 , SFP1 , RME1 , YOR214C
Mig2	YLL014W	MIG2 , MIG1 , ADR1 , TEC1 , SFP1 , YLL014W
Mig2	YJL148W	MIG2 , MIG1 , ADR1 , TEC1 , SFP1 , RPA34
Mig2	YAR009C	MIG2 , MIG1 , ADR1 , TEC1 , SFP1 , GCR1 , YAR009C
Mig2	YBL068W	MIG2 , MIG1 , ADR1 , PRS4
Mig2	YNL211C	MIG2 , MIG1 , ADR1 , TEC1 , SFP1 , ARR1 , YNL211C
Mig2	YIL035C	MIG2 , MIG1 , ADR1 , PDR1 , PDR3 , CKA1
Mig2	YJL049W	MIG2 , MIG1 , ADR1 , TEC1 , SFP1 , YJL049W
Mig2	YDR473C	MIG2 , MIG1 , NRG1 , XBP1 , YRR1 , YAP1 , PRP3
Mig2	YLR199C	MIG2 , MIG1 , ADR1 , PDR1 , RPN4 , PBA1
Mig2	YDL245C	MIG2 , MIG1 , GAL4 , MGA1 , MSN4 , HXT15
Mig2	YLR274W	MIG2 , MIG1 , NRG1 , RSF2 , HAP4 , YOX1 , MCM5
Mig2	YDR117C	MIG2 , MIG1 , ADR1 , TEC1 , SFP1 , TMA64
Mig2	YNL111C	MIG2 , MIG1 , ADR1 , PDR1 , CYB5
Mig2	YJR010C-A	MIG2 , MIG1 , GAL4 , MGA1 , MSN4 , SPC1
Mig2	YLR200W	MIG2 , MIG1 , ADR1 , TEC1 , SFP1 , HAC1 , YKE2
Mig2	YJR159W	MIG2 , MIG1 , NRG1 , RSF2 , HAP4 , SOR1
Mig2	YOL083W	MIG2 , MIG1 , ADR1 , PDR1 , PDR3 , YOL083W
Mig2	YOR365C	MIG2 , MIG1 , ADR1 , TEC1 , SFP1 , YAP1 , RAP1 , YOR365C
Mig2	YPL267W	MIG2 , MIG1 , ADR1 , TEC1 , SFP1 , ACM1
Mig2	YBR065C	MIG2 , MIG1 , NRG1 , RSF2 , HAP4 , GCN4 , ECM2
Mig2	YDR031W	MIG2 , MIG1 , NRG1 , MIC14
Mig2	YDR343C	MIG2 , MIG1 , NRG1 , HXT6
Mig2	YEL070W	MIG2 , DSF1
Mig2	YBR109C	MIG2 , MIG1 , ADR1 , TEC1 , SFP1 , CAD1 , MET4 , CMD1
Mig2	YNL210W	MIG2 , MIG1 , CAT8 , IME1 , MER1
Mig2	YOR367W	MIG2 , MIG1 , ADR1 , TEC1 , SFP1 , SCP1
Mig2	YMR052W	MIG2 , MIG1 , ADR1 , TEC1 , SFP1 , HSF1 , FAR3
Mig2	YDR412W	MIG2 , MIG1 , ADR1 , TEC1 , SFP1 , RRP17
Mig2	YOR307C	MIG2 , MIG1 , ADR1 , TEC1 , SFP1 , SLY41
Mig2	YOR059C	MIG2 , MIG1 , ADR1 , TEC1 , SFP1 , YOR059C
Mig2	YOR368W	MIG2 , MIG1 , GAL4 , MGA1 , STE12 , RAD17
Mig2	YER134C	MIG2 , MIG1 , NRG1 , XBP1 , YER134C
Mig2	YGL195W	MIG2 , MIG1 , ADR1 , TEC1 , SFP1 , GCN1
Mig2	YDR411C	MIG2 , MIG1 , ADR1 , TEC1 , SFP1 , HAC1 , DFM1
Mig2	YDL091C	MIG2 , MIG1 , NRG1 , UBX3
Mig2	YNR054C	MIG2 , MIG1 , ADR1 , TEC1 , SFP1 , ESF2
Mig2	YDR165W	MIG2 , MIG1 , ADR1 , PDR1 , PDR3 , TRM82
Mig2	YLR273C	MIG2 , MIG1 , ADR1 , PDR1 , RPN4 , PIG1
Mig2	YDR294C	MIG2 , MIG1 , ADR1 , DPL1
Mig2	YDR030C	MIG2 , MIG1 , NRG1 , RAD28
Mig2	YBR032W	MIG2 , MIG1 , ADR1 , TEC1 , SFP1 , GCR1 , YBR032W
Mig2	YDL246C	MIG2 , MIG1 , ADR1 , PDR1 , RPN4 , SOR2
Mig2	YMR283C	MIG2 , MIG1 , ADR1 , PIP2 , RIT1
Mig2	YBR185C	MIG2 , MIG1 , GAL4 , MGA1 , MSN4 , MBA1
Mig2	YDR355C	MIG2 , MIG1 , ADR1 , PDR1 , RPN4 , YDR355C
Mig2	YJR158W	MIG2 , MIG1 , NRG1 , RSF2 , HAP4 , HXT16
Mig2	YGR188C	MIG2 , MIG1 , ADR1 , BUB1
Mig2	YMR131C	MIG2 , MIG1 , ADR1 , PDR1 , PDR3 , RRB1
Mig2	YBR120C	MIG2 , MIG1 , GAL4 , MGA1 , MSN4 , CBP6
Mig2	YBR232C	MIG2 , MIG1 , ADR1 , PDR1 , YBR232C
Mig2	YOR021C	MIG2 , MIG1 , GAL4 , MGA1 , MSN4 , YOR021C
Mig2	YEL069C	MIG2 , HXT13
Mig2	YPR134W	MIG2 , MIG1 , GAL4 , MGA1 , MSN4 , MSN2 , MSS18
Pip2	YLR079W	PIP2 , PDR1 , RPN4 , YAP1 , SWI5 , SIC1
Pip2	YLR252W	PIP2 , PDR1 , YLR252W
Pip2	YEL011W	PIP2 , GLC3
Pip2	YMR165C	PIP2 , PDR1 , PAH1
Pip2	YJL148W	PIP2 , PDR1 , RPN4 , YAP1 , RPA34
Pip2	YBR151W	PIP2 , PDR1 , YRR1 , APD1
Pip2	YLR046C	PIP2 , PDR1 , YRR1 , YLR046C
Pip2	YLR089C	PIP2 , PDR1 , RPN4 , ALT1
Pip2	YKL092C	PIP2 , PDR1 , RPN4 , YAP1 , SFP1 , BUD2
Pip2	YGL201C	PIP2 , PDR1 , HAP4 , YOX1 , MCM6
Pip2	YNL322C	PIP2 , PDR1 , HAP4 , GCN4 , LEU3 , SOK2 , KRE1
Pip2	YNL113W	PIP2 , PDR1 , RPN4 , YAP1 , SFP1 , RPC19
Pip2	YDR312W	PIP2 , PDR1 , RPN4 , YAP1 , SFP1 , SSF2
Pip2	YPL016W	PIP2 , PDR1 , RPN4 , MGA1 , MSN4 , SWI1
Pip2	YER015W	PIP2 , FAA2
Pip2	YCR106W	PIP2 , PDR1 , HAP4 , GCN4 , RDS1
Pip2	YLR078C	PIP2 , PDR1 , RPN4 , YAP1 , SFP1 , BOS1
Pip2	YAL034W-A	PIP2 , PDR1 , MTW1
Pip2	YGR109C	PIP2 , PDR1 , HAP4 , NDT80 , CLB6
Pip2	YKL093W	PIP2 , PDR1 , RPN4 , MBR1
Pip2	YBR214W	PIP2 , PDR1 , PDR3 , SDS24
Pip2	YPL262W	PIP2 , PDR1 , HAP4 , FUM1
Pip2	YNL321W	PIP2 , PDR1 , RPN4 , YAP1 , SFP1 , VNX1
Pip2	YMR325W	PIP2 , PDR1 , RPN4 , UPC2 , YMR325W
Pip2	YDL059C	PIP2 , PDR1 , HAP4 , GCN4 , MET4 , RAD59
Pip2	YJR065C	PIP2 , PDR1 , RPN4 , YAP1 , ARP3
Pip2	YGR145W	PIP2 , PDR1 , PDR3 , ENP2
Pip2	YBR020W	PIP2 , PDR1 , HAP4 , GCN4 , GAL1
Pip2	YJL222W	PIP2 , PDR1 , RPN4 , YAP1 , AFT1 , VTH2
Pip2	YJR071W	PIP2 , PDR1 , RPN4 , YAP1 , YJR071W
Pip2	YHR042W	PIP2 , PDR1 , RPN4 , UPC2 , NCP1
Pip2	YDL058W	PIP2 , PDR1 , RPN4 , YAP1 , USO1
Pip2	YMR043W	PIP2 , PDR1 , HAP4 , GCN4 , LEU3 , MCM1
Pip2	YGR177C	PIP2 , PDR1 , RPN4 , UPC2 , ATF2
Pip2	YPL059W	PIP2 , PDR1 , RPN4 , YAP1 , GRX5
Pip2	YGR109W-B	PIP2 , PDR1 , RPN4 , YGR109W-B
Pip2	YGR109W-A	PIP2 , PDR1 , RPN4 , YGR109W-A
Pip2	YGR188C	PIP2 , PDR1 , HAP4 , GCN4 , BUB1
Pip2	YBR150C	PIP2 , PDR1 , RPN4 , YAP1 , TBS1
Pip2	YBR187W	PIP2 , PDR1 , RPN4 , YAP1 , GDT1
Pip2	YBR019C	PIP2 , PDR1 , RPN4 , YAP1 , SFP1 , GAL10
Pip2	YPR166C	PIP2 , PDR1 , RPN4 , MRP2
Pip2	YLR240W	PIP2 , PDR1 , RPN4 , YAP1 , SFP1 , ARR1 , VPS34
Pip2	YKL146W	PIP2 , PDR1 , HAP4 , GCN4 , MET4 , AVT3
Pip2	YDR208W	PIP2 , PDR1 , HAP4 , GCN4 , MSS4
Pip2	YLR177W	PIP2 , PDR1 , HAP4 , GCN4 , MET4 , YLR177W
Pip2	YDL123W	PIP2 , PDR1 , HAP4 , GCN4 , MET4 , SNA4
Pip2	YIL125W	PIP2 , PDR1 , HAP4 , KGD1
Pip2	YGL172W	PIP2 , PDR1 , RPN4 , YAP1 , SFP1 , NUP49
Pip2	YNL007C	PIP2 , PDR1 , YRR1 , SIS1
Pip2	YDR256C	PIP2 , CTA1
Pip2	YLR090W	PIP2 , PDR1 , RPN4 , YAP1 , AFT1 , CAD1 , XDJ1
Pip2	YJL023C	PIP2 , PDR1 , RPN4 , YAP1 , AFT1 , PET130
Pip2	YIL069C	PIP2 , PDR1 , RPN4 , RPS24B
Pip2	YMR324C	PIP2 , PDR1 , RPN4 , YAP1 , MSN2 , AZF1 , YMR324C
Pip2	YOR329C	PIP2 , PDR1 , RPN4 , SCD5
Pip2	YAR066W	PIP2 , PDR1 , YAR066W
Pip2	YIL120W	PIP2 , PDR1 , HAP4 , GCN4 , OAF1 , QDR1
Pip2	YAL036C	PIP2 , PDR1 , PDR3 , RBG1
Pip2	YLR174W	PIP2 , IDP2
Pip2	YJR045C	PIP2 , PDR1 , RPN4 , YAP1 , SSC1
Pip2	YFR015C	PIP2 , RSC30 , BAS1 , GSY1
Pip2	YKL054C	PIP2 , PDR1 , RPN4 , YAP1 , DEF1
Pip2	YMR107W	PIP2 , SPS18 , SPG4
Pip2	YHR171W	PIP2 , PDR1 , RPN4 , MGA1 , ATG7
Pip2	YKL148C	PIP2 , PDR1 , HAP4 , SDH1
Pip2	YIL101C	PIP2 , PDR1 , RPN4 , XBP1
Pip2	YOR301W	PIP2 , PDR1 , HAP4 , RAX1
Pip2	YBR048W	PIP2 , RPS11B
Pip2	YJR066W	PIP2 , PDR1 , HAP4 , CAT8 , TOR1
Pip2	YPL263C	PIP2 , PDR1 , RPN4 , YAP1 , KEL3
Pip2	YCL068C	PIP2 , PDR1 , HAP4 , GCN4 , MET4 , YCL068C
Pip2	YOL083W	PIP2 , PDR1 , PDR3 , YOL083W
Pip2	YER138C	PIP2 , PDR1 , RPN4 , YAP1 , YER138C
Pip2	YKR096W	PIP2 , PDR1 , RPN4 , YKR096W
Pip2	YBR127C	PIP2 , PDR1 , RPN4 , YAP1 , VMA2
Pip2	YNL115C	PIP2 , PDR1 , RPN4 , YNL115C
Pip2	YPL017C	PIP2 , PDR1 , IRC15
Pip2	YEL054C	PIP2 , PDR1 , RPN4 , RPL12A
Pip2	YIL114C	PIP2 , PDR1 , HAP4 , GCN4 , MET4 , POR2
Pip2	YHL021C	PIP2 , PDR1 , YHL021C
Pip2	YAL035W	PIP2 , PDR1 , RPN4 , YAP1 , SFP1 , FUN12
Pip2	YJR046W	PIP2 , PDR1 , HAP4 , GCN4 , LEU3 , TAH11
Pip2	YGL173C	PIP2 , PDR1 , RPN4 , YAP1 , AFT1 , KEM1
Pip2	YNL006W	PIP2 , PDR1 , HAP4 , GCN4 , LST8
Pip2	YLR176C	PIP2 , PDR1 , HAP4 , GCN4 , RFX1
Pip2	YNL299W	PIP2 , PDR1 , HAP4 , GCN4 , STB5 , TRF5
Pip2	YKL211C	PIP2 , PDR1 , HAP4 , GCN4 , TRP3
Pip2	YGL143C	PIP2 , PDR1 , NRG1 , MRF1
Ace2	YJL098W	ACE2 , RME1 , SPT2 , MSN4 , MSN2 , SAP185
Ace2	YML007W	ACE2 , RME1 , SPT2 , MSN4 , RPN4 , YAP1
Ace2	YFL056C	ACE2 , RME1 , SPT2 , MSN4 , RPN4 , AAD6
Ace2	YER125W	ACE2 , RME1 , SPT2 , MSN4 , RPN4 , RSP5
Ace2	YFR017C	ACE2 , RME1 , SPT2 , MSN4 , YFR017C
Ace2	YJR145C	ACE2 , RME1 , SPT2 , MSN4 , RPN4 , RPS4A
Ace2	YDR154C	ACE2 , RME1 , SPT2 , MSN4 , MSN2 , YDR154C
Ace2	YDR010C	ACE2 , RME1 , NRG1 , RSF2 , HAP4 , GCN4 , MET4 , YDR010C
Ace2	YGL008C	ACE2 , RME1 , SPT2 , MSN4 , MSN2 , PMA1
Ace2	YLL020C	ACE2 , RME1 , MIG3 , MIG1 , GAL4 , ZAP1 , YLL020C
Ace2	YPL056C	ACE2 , RME1 , NRG1 , RSF2 , HAP4 , GCN4 , LEU3 , YPL056C
Ace2	YHR193C	ACE2 , RME1 , NRG1 , RSF2 , HAP4 , GCN4 , MET4 , EGD2
Ace2	YPL251W	ACE2 , RME1 , SPT2 , MSN4 , RPN4 , YPL251W
Ace2	YER189W	ACE2 , RME1 , SPT2 , MSN4 , RPN4 , YAP1 , YER189W
Ace2	YGL133W	ACE2 , RME1 , SPT2 , MSN4 , RPN4 , YAP1 , ITC1
Ace2	YJL080C	ACE2 , RME1 , NRG1 , RSF2 , HAP4 , GCN4 , SCP160
Ace2	YMR261C	ACE2 , RME1 , SPT2 , MSN4 , TPS3
Ace2	YKL084W	ACE2 , RME1 , SPT2 , MSN4 , RPN4 , YAP1 , HOT13
Ace2	YMR165C	ACE2 , GAT1 , GZF3 , PAH1
Ace2	YNL328C	ACE2 , RME1 , NRG1 , RSF2 , HAP4 , GCN4 , MDJ2
Ace2	YHL013C	ACE2 , RME1 , SPT2 , MSN4 , OTU2
Ace2	YAL040C	ACE2 , RME1 , KAR4 , CLN3
Ace2	YKL096W-A	ACE2 , RME1 , SPT2 , MSN4 , MSN2 , CWP2
Ace2	YBR157C	ACE2 , RME1 , MIG3 , MIG1 , ICS2
Ace2	YER078C	ACE2 , RME1 , SPT2 , MSN4 , RPN4 , YAP1 , RAP1 , YER078C
Ace2	YJR044C	ACE2 , RME1 , SPT2 , VPS55
Ace2	YER126C	ACE2 , RME1 , NRG1 , XBP1 , YRR1 , PDR3 , NSA2
Ace2	YDR155C	ACE2 , RME1 , MIG3 , MIG1 , TOS8 , CPR1
Ace2	YFL021W	ACE2 , GAT1
Ace2	YOR315W	ACE2 , RME1 , NRG1 , SFG1
Ace2	YKL142W	ACE2 , RME1 , MIG3 , MIG1 , CAT8 , MRP8
Ace2	YDL126C	ACE2 , RME1 , SPT2 , MSN4 , CDC48
Ace2	YPL024W	ACE2 , RME1 , MIG3 , MIG1 , GAL4 , ZAP1 , RMI1
Ace2	YGR041W	ACE2 , BUD9
Ace2	YML100W	ACE2 , RME1 , SPT2 , MSN4 , TSL1
Ace2	YBR230C	ACE2 , RME1 , MIG3 , MIG1 , CAT8 , OM14
Ace2	YPR115W	ACE2 , RME1 , NRG1 , RSF2 , HAP4 , GCN4 , MET4 , YPR115W
Ace2	YGL227W	ACE2 , RME1 , SPT2 , MSN4 , RPN4 , VID30
Ace2	YPL018W	ACE2 , RME1 , MIG3 , MIG1 , ADR1 , CTF19
Ace2	YJR148W	ACE2 , RME1 , SPT2 , MSN4 , RPN4 , YAP1 , BAT2
Ace2	YJR146W	ACE2 , RME1 , SPT2 , MSN4 , RPN4 , YAP1 , YJR146W
Ace2	YLR371W	ACE2 , RME1 , SPT2 , MSN4 , RPN4 , YAP1 , ROM2
Ace2	YER081W	ACE2 , RME1 , SPT2 , MSN4 , RPN4 , YAP1 , SER3
Ace2	YBR162C	ACE2 , RME1 , SPT2 , MSN4 , MSN2 , AZF1 , TOS1
Ace2	YPL230W	ACE2 , RME1 , NRG1 , USV1
Ace2	YNL241C	ACE2 , RME1 , SPT2 , MSN4 , ZWF1
Ace2	YDR011W	ACE2 , RME1 , RDS3 , SNQ2
Ace2	YFL057C	ACE2 , RME1 , SPT2 , MSN4 , RPN4 , AAD16
Ace2	YNR018W	ACE2 , RME1 , SPT2 , MSN4 , RPN4 , YAP1 , YNR018W
Ace2	YLR287C-A	ACE2 , RME1 , SPT2 , MSN4 , HAC1 , RPS30A
Ace2	YER068W	ACE2 , RME1 , SPT2 , MSN4 , RPN4 , MOT2
Ace2	YHR091C	ACE2 , RME1 , NRG1 , RSF2 , HAP4 , GCN4 , SUM1 , MSR1
Ace2	YBR159W	ACE2 , RME1 , MIG3 , MIG1 , ADR1 , YBR159W
Ace2	YKL150W	ACE2 , RME1 , NRG1 , MCR1
Ace2	YML004C	ACE2 , RME1 , SPT2 , MSN4 , GLO1
Ace2	YMR262W	ACE2 , RME1 , SPT2 , MSN4 , RPN4 , YAP1 , AFT1 , YMR262W
Ace2	YGL147C	ACE2 , RME1 , SPT2 , MSN4 , RPN4 , RPL9A
Ace2	YHR143W	ACE2 , DSE2
Ace2	YLR300W	ACE2 , RME1 , SPT2 , MSN4 , MSN2 , EXG1
Ace2	YOR344C	ACE2 , RME1 , SPT2 , MSN4 , HAC1 , TYE7
Ace2	YKL146W	ACE2 , RME1 , SPT2 , MSN4 , MSN2 , AVT3
Ace2	YMR251W-A	ACE2 , RME1 , YPR015C , HOR7
Ace2	YLR256W-A	ACE2 , RME1 , MIG3 , MIG1 , ADR1 , TEC1 , SFP1 , ARR1 , CDC14 , YLR256W-A
Ace2	YBR229C	ACE2 , RME1 , SPT2 , MSN4 , RPN4 , YAP1 , ROT2
Ace2	YML083C	ACE2 , GAT1 , GZF3 , YML083C
Ace2	YPR106W	ACE2 , ISR1
Ace2	YLR256W	ACE2 , RME1 , SPT2 , MSN4 , RPN4 , UPC2 , HAP1
Ace2	YEL007W	ACE2 , RME1 , SPT2 , MSN4 , MSN2 , YEL007W
Ace2	YDR158W	ACE2 , RME1 , SPT2 , MSN4 , RPN4 , HOM2
Ace2	YML008C	ACE2 , RME1 , NRG1 , RSF2 , HAP4 , GCN4 , MET4 , ERG6
Ace2	YGL229C	ACE2 , RME1 , MIG3 , MIG1 , CAT8 , SAP4
Ace2	YMR135W-A	ACE2 , RME1 , SPT2 , MSN4 , MSN2 , YMR135W-A
Ace2	YHL029C	ACE2 , RME1 , SPT2 , MSN4 , RPN4 , YHL029C
Ace2	YDL042C	ACE2 , RME1 , NRG1 , RSF2 , HAP4 , GCN4 , SIR2
Ace2	YAL062W	ACE2 , RME1 , SPT2 , MSN4 , GDH3
Ace2	YGR283C	ACE2 , RME1 , NRG1 , RSF2 , HAP4 , GCN4 , GLN3 , YGR283C
Ace2	YJL160C	ACE2 , RME1 , SPT2 , YJL160C
Ace2	YHL028W	ACE2 , GAT1 , GZF3 , WSC4
Ace2	YKR042W	ACE2 , RME1 , NRG1 , RSF2 , HAP4 , UTH1
Ace2	YBL023C	ACE2 , RME1 , SPT2 , MSN4 , RPN4 , MCM2
Ace2	YPL019C	ACE2 , RME1 , SPT2 , MSN4 , HAC1 , VTC3
Ace2	YJR149W	ACE2 , GAT1 , GZF3 , YJR149W
Ace2	YJL075C	ACE2 , RME1 , NRG1 , XBP1 , YRR1 , PDR3 , APQ13
Ace2	YGL228W	ACE2 , RME1 , MIG3 , MIG1 , ADR1 , TEC1 , SFP1 , SHE10
Ace2	YKL097C	ACE2 , RME1 , NRG1 , RSF2 , HAP4 , GCN4 , MET4 , YKL097C
Ace2	YML082W	ACE2 , RME1 , SPT2 , MSN4 , RPN4 , YAP1 , YML082W
Ace2	YGL007W	ACE2 , RME1 , MIG3 , MIG1 , ADR1 , TEC1 , SFP1 , ARR1 , BRP1
Ace2	YER127W	ACE2 , RME1 , NRG1 , RSF2 , HAP4 , GCN4 , LCP5
Ace2	YDR345C	ACE2 , RME1 , SPT2 , MSN4 , HXT3
Ace2	YBR162W-A	ACE2 , RME1 , SPT2 , MSN4 , HAC1 , YSY6
Ace2	YKL148C	ACE2 , RME1 , MIG3 , MIG1 , CAT8 , SDH1
Ace2	YHL012W	ACE2 , RME1 , NRG1 , RSF2 , PHO4 , YHL012W
Ace2	YNL079C	ACE2 , RME1 , SPT2 , MSN4 , RPN4 , YAP1 , AFT1 , CAD1 , TPM1
Ace2	YNL078W	ACE2 , NIS1
Ace2	YIL009W	ACE2 , RME1 , NRG1 , RSF2 , HAP4 , GCN4 , FAA3
Ace2	YDR277C	ACE2 , RME1 , MIG3 , MTH1
Ace2	YER079W	ACE2 , RME1 , SPT2 , MSN4 , YER079W
Ace2	YDR156W	ACE2 , RME1 , SPT2 , RPA14
Ace2	YML101C	ACE2 , RME1 , MIG3 , MIG1 , ADR1 , TEC1 , SFP1 , CUE4
Ace2	YLR397C	ACE2 , RME1 , NRG1 , RSF2 , HAP4 , GCN4 , AFG2
Ace2	YGR234W	ACE2 , RME1 , SPT2 , MSN4 , RPN4 , YHB1
Ace2	YJR147W	ACE2 , RME1 , NRG1 , XBP1 , YRR1 , HMS2
Ace2	YHR195W	ACE2 , RME1 , SPT2 , MSN4 , MSN2 , NVJ1
Ace2	YGR125W	ACE2 , RME1 , SPT2 , MSN4 , RPN4 , YAP1 , YGR125W
Ace2	YNL154C	ACE2 , RME1 , MIG3 , MIG1 , ADR1 , TEC1 , SFP1 , YCK2
Ace2	YPL253C	ACE2 , GAT1 , GZF3 , VIK1
Ace2	YFL022C	ACE2 , RME1 , SPT2 , MSN4 , FRS2
Ace2	YER088C	ACE2 , RME1 , NRG1 , RSF2 , HAP4 , GCN4 , DOT6
Ace2	YKL151C	ACE2 , RME1 , SPT2 , MSN4 , YKL151C
Ace2	YER066C-A	ACE2 , RME1 , MIG3 , MIG1 , ADR1 , PDR1 , YER066C-A
Ace2	YLR439W	ACE2 , RME1 , SPT2 , MSN4 , MRPL4
Ace2	YKL030W	ACE2 , RME1 , SPT2 , MSN4 , RPN4 , YAP1 , YKL030W
Ace2	YER177W	ACE2 , RME1 , NRG1 , XBP1 , YRR1 , BMH1
Ace2	YDR157W	ACE2 , RME1 , SPT2 , MSN4 , RPN4 , YAP1 , YDR157W
Ace2	YML131W	ACE2 , RME1 , MIG3 , MIG1 , YML131W
Ace2	YNL098C	ACE2 , RME1 , SPT2 , MSN4 , MSN2 , RAS2
Ace2	YLL019C	ACE2 , RME1 , SPT2 , MSN4 , HAC1 , KNS1
Ace2	YIR004W	ACE2 , RME1 , SPT2 , MSN4 , RPN4 , YAP1 , DJP1
Ace2	YDL055C	ACE2 , RME1 , MIG3 , MIG1 , TOS8 , PSA1
Ace2	YLR207W	ACE2 , RME1 , MIG3 , MIG1 , ADR1 , TEC1 , SFP1 , HRD3
Ace2	YNL327W	ACE2 , EGT2
Aft2	YEL076C	AFT2 , CAD1 , MET4 , SFP1 , ADR1 , YEL076C
Aft2	YCR096C	AFT2 , CAD1 , MET4 , HAC1 , HMRA2
Aft2	YMR152W	AFT2 , CAD1 , MET4 , YAP1 , MGA1 , YIM1
Aft2	YCR105W	AFT2 , CAD1 , SPT2 , ADH7
Aft2	YDR534C	AFT2 , FIT1
Aft2	YHR148W	AFT2 , CAD1 , MET4 , IMP3
Aft2	YDL184C	AFT2 , CAD1 , MET4 , RPL41A
Aft2	YNL270C	AFT2 , CAD1 , MET4 , AFT1 , ALP1
Aft2	YBL112C	AFT2 , CAD1 , MET4 , YBL112C
Aft2	YEL074W	AFT2 , CAD1 , MET4 , YEL074W
Aft2	YBL109W	AFT2 , CAD1 , YBL109W
Aft2	YIL083C	AFT2 , CAD1 , MET4 , SFP1 , YHP1 , ECM22 , YIL083C
Aft2	YHL042W	AFT2 , CAD1 , MET4 , GIS1 , YHL042W
Aft2	YLR464W	AFT2 , CAD1 , MET4 , SFP1 , YLR464W
Aft2	YMR219W	AFT2 , CAD1 , MET4 , ESC1
Aft2	YDR179C	AFT2 , CAD1 , MET4 , AFT1 , CSN9
Aft2	YMR155W	AFT2 , CAD1 , SPT2 , MSN4 , STE12 , YMR155W
Aft2	YCR019W	AFT2 , CAD1 , MET4 , MAK32
Aft2	YFR041C	AFT2 , CAD1 , MET4 , SFP1 , GLN3 , ERJ5
Aft2	YLR014C	AFT2 , CAD1 , SPT2 , MSN4 , PPR1
Aft2	YNL268W	AFT2 , CAD1 , MET4 , YAP1 , LYP1
Aft2	YLR125W	AFT2 , CAD1 , MET4 , SFP1 , HSF1 , YLR125W
Aft2	YBR077C	AFT2 , CAD1 , MET4 , SFP1 , SLM4
Aft2	YHR147C	AFT2 , CAD1 , MET4 , SUM1 , MRPL6
Aft2	YDL154W	AFT2 , CAD1 , MET4 , YAP1 , IFH1 , MSH5
Aft2	YLR261C	AFT2 , CAD1 , MET4 , SFP1 , VPS63
Aft2	YEL075C	AFT2 , CAD1 , MET4 , AFT1 , YEL075C
Aft2	YDL089W	AFT2 , CAD1 , SPT2 , MSN4 , YDL089W
Aft2	YKR060W	AFT2 , CAD1 , MET4 , XBP1 , UTP30
Aft2	YGL227W	AFT2 , CAD1 , MET4 , RPN4 , VID30
Aft2	YBR102C	AFT2 , CAD1 , MET4 , PIP2 , EXO84
Aft2	YKL077W	AFT2 , CAD1 , MET4 , YAP1 , YKL077W
Aft2	YOL144W	AFT2 , CAD1 , MET4 , SFP1 , NOP8
Aft2	YDL090C	AFT2 , CAD1 , MET4 , SFP1 , RAM1
Aft2	YLR034C	AFT2 , SMF3
Aft2	YLR462W	AFT2 , CAD1 , MET4 , YLR462W
Aft2	YHR085W	AFT2 , CAD1 , MET4 , SFP1 , IPI1
Aft2	YHR090C	AFT2 , CAD1 , MET4 , SFP1 , YNG2
Aft2	YKL010C	AFT2 , CAD1 , MET4 , RPN4 , UFD4
Aft2	YNL214W	AFT2 , CAD1 , MET4 , ACE2 , RME1 , PEX17
Aft2	YIL177C	AFT2 , CAD1 , MET4 , SFP1 , YIL177C
Aft2	YKR056W	AFT2 , CAD1 , MET4 , AFT1 , TEC1 , TRM2
Aft2	YHL049C	AFT2 , CAD1 , MET4 , AFT1 , YHL049C
Aft2	YOR226C	AFT2 , CAD1 , MET4 , AFT1 , ISU2
Aft2	YDR179W-A	AFT2 , CAD1 , MET4 , SFP1 , YDR179W-A
Aft2	YEL076C-A	AFT2 , CAD1 , MET4 , YAP1 , MSN2 , YEL076C-A
Aft2	YML133C	AFT2 , CAD1 , MET4 , SFP1 , YML133C
Aft2	YKL009W	AFT2 , CAD1 , MET4 , MRT4
Aft2	YNL339C	AFT2 , CAD1 , MET4 , SFP1 , YRF1-6
Aft2	YBR078W	AFT2 , CAD1 , MET4 , ECM33
Aft2	YBL111C	AFT2 , CAD1 , MET4 , SFP1 , ADR1 , YBL111C
Aft2	YKL049C	AFT2 , CAD1 , MET4 , SFP1 , CSE4
Aft2	YOR227W	AFT2 , CAD1 , MET4 , HER1
Aft2	YGL259W	AFT2 , CAD1 , MET4 , PDR1 , YPS5
Aft2	YHL011C	AFT2 , CAD1 , MET4 , PDR1 , PRS3
Aft2	YPL034W	AFT2 , CAD1 , MET4 , YPL034W
Aft2	YMR200W	AFT2 , CAD1 , MET4 , SFP1 , ROT1
Aft2	YHR012W	AFT2 , CAD1 , MET4 , SFP1 , VPS29
Aft2	YJL225C	AFT2 , CAD1 , MET4 , YJL225C
Aft2	YLR410W-B	AFT2 , CAD1 , MET4 , HAC1 , YLR410W-B
Aft2	YLR410W-A	AFT2 , CAD1 , MET4 , PIP2 , YLR410W-A
Aft2	YHL010C	AFT2 , CAD1 , MET4 , YAP1 , MGA1 , YHL010C
Aft2	YHR091C	AFT2 , CAD1 , MET4 , SUM1 , MSR1
Aft2	YLR466W	AFT2 , CAD1 , MET4 , SFP1 , YRF1-4
Aft2	YCR107W	AFT2 , CAD1 , MET4 , AAD3
Aft2	YIL070C	AFT2 , CAD1 , MET4 , MAM33
Aft2	YBR080C	AFT2 , CAD1 , MET4 , SEC18
Aft2	YMR154C	AFT2 , CAD1 , MET4 , SFP1 , HSF1 , RIM13
Aft2	YFR042W	AFT2 , CAD1 , MET4 , HAC1 , KEG1
Aft2	YHR005C	AFT2 , CAD1 , MET4 , SFP1 , ARR1 , GPA1
Aft2	YDR473C	AFT2 , CAD1 , MET4 , YAP1 , PRP3
Aft2	YDL045W-A	AFT2 , CAD1 , MET4 , HAC1 , MRP10
Aft2	YBR217W	AFT2 , CAD1 , MET4 , SFP1 , ATG12
Aft2	YDL114W	AFT2 , CAD1 , MET4 , SFP1 , YDL114W
Aft2	YJR135C	AFT2 , CAD1 , MET4 , NRG1 , MCM22
Aft2	YMR126C	AFT2 , CAD1 , MET4 , SFP1 , DLT1
Aft2	YLR284C	AFT2 , CAD1 , MET4 , PIP2 , ECI1
Aft2	YLR068W	AFT2 , CAD1 , MET4 , SFP1 , GLN3 , FYV7
Aft2	YNL101W	AFT2 , CAD1 , MET4 , SFP1 , AVT4
Aft2	YKR052C	AFT2 , MRS4
Aft2	YDL115C	AFT2 , CAD1 , MET4 , SFP1 , IWR1
Aft2	YLR285W	AFT2 , CAD1 , MET4 , OAF1 , NNT1
Pdr1	YFR040W	PDR1 , RPN4 , YAP1 , SAP155
Pdr1	YDL147W	PDR1 , RPN4 , YAP1 , RPN5
Pdr1	YMR165C	PDR1 , PAH1
Pdr1	YFR017C	PDR1 , YFR017C
Pdr1	YCR105W	PDR1 , RPN4 , YAP1 , ADH7
Pdr1	YOR325W	PDR1 , RPN4 , YOR325W
Pdr1	YGL104C	PDR1 , RPN4 , YAP1 , AFT1 , VPS73
Pdr1	YOR273C	PDR1 , TPO4
Pdr1	YPL019C	PDR1 , VTC3
Pdr1	YBL109W	PDR1 , RPN4 , YAP1 , YBL109W
Pdr1	YPR102C	PDR1 , RPN4 , RPL11A
Pdr1	YLR048W	PDR1 , RPN4 , RPS0B
Pdr1	YHR193C	PDR1 , HAP4 , GCN4 , MET4 , EGD2
Pdr1	YPL251W	PDR1 , RPN4 , YPL251W
Pdr1	YBR040W	PDR1 , HAP4 , FIG1
Pdr1	YLL065W	PDR1 , RPN4 , YAP1 , AFT1 , YLL065W
Pdr1	YLR464W	PDR1 , RPN4 , YAP1 , SFP1 , YLR464W
Pdr1	YJL191W	PDR1 , RPN4 , YAP1 , RPS14B
Pdr1	YDL114W	PDR1 , RPN4 , YAP1 , SFP1 , YDL114W
Pdr1	YOR381W	PDR1 , RPN4 , YAP1 , AFT1 , FRE3
Pdr1	YNL302C	PDR1 , RPN4 , RPS19B
Pdr1	YDR545W	PDR1 , HAP4 , GCN4 , MET4 , ACE2 , YRF1-1
Pdr1	YMR015C	PDR1 , ERG5
Pdr1	YLR462W	PDR1 , HAP4 , GCN4 , MET4 , YLR462W
Pdr1	YJR044C	PDR1 , RPN4 , YAP1 , VPS55
Pdr1	YDL076C	PDR1 , RPN4 , YAP1 , SFP1 , RXT3
Pdr1	YNL339C	PDR1 , RPN4 , YAP1 , SFP1 , YRF1-6
Pdr1	YLR465C	PDR1 , HAP4 , GCN4 , MET4 , BSC3
Pdr1	YDR235W	PDR1 , RPN4 , YAP1 , SFP1 , PRP42
Pdr1	YDR042C	PDR1 , RPN4 , YAP1 , SFP1 , YDR042C
Pdr1	YIL148W	PDR1 , RPN4 , YAP1 , RAP1 , RPL40A
Pdr1	YDR418W	PDR1 , RPN4 , RPL12B
Pdr1	YHR138C	PDR1 , PDR3 , YHR138C
Pdr1	YIL129C	PDR1 , HAP4 , GCN4 , RFX1 , TAO3
Pdr1	YGR117C	PDR1 , RPN4 , YAP1 , YGR117C
Pdr1	YIL018W	PDR1 , HAP4 , GCN4 , MET4 , RPL2B
Pdr1	YPL018W	PDR1 , MIG2 , MIG1 , ADR1 , CTF19
Pdr1	YDL075W	PDR1 , RPN4 , RPL31A
Pdr1	YDL130W	PDR1 , RPN4 , RPP1B
Pdr1	YBL113C	PDR1 , RPN4 , YAP1 , AFT1 , CAD1 , YBL113C
Pdr1	YGR085C	PDR1 , RPN4 , RPL11B
Pdr1	YIL174W	PDR1 , RPN4 , YAP1 , YIL174W
Pdr1	YDR366C	PDR1 , RPN4 , YAP1 , AFT1 , YDR366C
Pdr1	YGL103W	PDR1 , RPN4 , YAP1 , RPL28
Pdr1	YLR354C	PDR1 , RPN4 , YAP1 , TAL1
Pdr1	YGR118W	PDR1 , RPN4 , RPS23A
Pdr1	YOR318C	PDR1 , RPN4 , YAP1 , SFP1 , YOR318C
Pdr1	YGL135W	PDR1 , RPN4 , RPL1B
Pdr1	YGL006W	PDR1 , RPN4 , MGA1 , MSN4 , PMC1
Pdr1	YOR269W	PDR1 , RPN4 , YAP1 , SFP1 , PAC1
Pdr1	YBR190W	PDR1 , RPN4 , YBR190W
Pdr1	YDR064W	PDR1 , RPN4 , RPS13
Pdr1	YCL067C	PDR1 , HAP4 , GCN4 , MET4 , HMLALPHA2
Pdr1	YDL099W	PDR1 , HAP4 , GCN4 , MET4 , BUG1
Pdr1	YIL177C	PDR1 , RPN4 , YAP1 , SFP1 , YIL177C
Pdr1	YBR159W	PDR1 , HAP4 , GCN4 , PIP2 , YBR159W
Pdr1	YLR463C	PDR1 , HAP4 , GCN4 , MET4 , YLR463C
Pdr1	YJL190C	PDR1 , RPN4 , RPS22A
Pdr1	YHL049C	PDR1 , RPN4 , YAP1 , AFT1 , YHL049C
Pdr1	YHR141C	PDR1 , RPN4 , RPL42B
Pdr1	YHR142W	PDR1 , RPN4 , YAP1 , CHS7
Pdr1	YFR031C-A	PDR1 , RPN4 , RPL2A
Pdr1	YOL121C	PDR1 , RPN4 , RPS19A
Pdr1	YDL083C	PDR1 , RPN4 , RPS16B
Pdr1	YBR191W	PDR1 , RPN4 , RPL21A
Pdr1	YMR241W	PDR1 , RPN4 , YAP1 , YHM2
Pdr1	YJL042W	PDR1 , RPN4 , YAP1 , SFP1 , MHP1
Pdr1	YMR240C	PDR1 , YRR1 , CUS1
Pdr1	YFL065C	PDR1 , RPN4 , YAP1 , YFL065C
Pdr1	YPR080W	PDR1 , RPN4 , YAP1 , RAP1 , TEF1
Pdr1	YBL087C	PDR1 , RPN4 , RPL23A
Pdr1	YDR471W	PDR1 , RPN4 , RPL27B
Pdr1	YJL134W	PDR1 , RPN4 , LCB3
Pdr1	YIL152W	PDR1 , HAP4 , GCN4 , YIL152W
Pdr1	YIL133C	PDR1 , RPN4 , RPL16A
Pdr1	YHR087W	PDR1 , YHR087W
Pdr1	YBL111C	PDR1 , MIG2 , MIG1 , ADR1 , YBL111C
Pdr1	YJL189W	PDR1 , RPL39
Pdr1	YML133C	PDR1 , RPN4 , YAP1 , SFP1 , YML133C
Pdr1	YOR268C	PDR1 , HAP4 , GCN4 , OAF1 , YOR268C
Pdr1	YNL236W	PDR1 , RPN4 , YAP1 , MSN2 , AZF1 , SIN4
Pdr1	YIL175W	PDR1 , RPN4 , MGA1 , YIL175W
Pdr1	YPR103W	PDR1 , RPN4 , PRE2
Pdr1	YER074W	PDR1 , RPN4 , RPS24A
Pdr1	YFR039C	PDR1 , HAP4 , CAT8 , YFR039C
Pdr1	YJL135W	PDR1 , RPN4 , YAP1 , IFH1 , YJL135W
Pdr1	YPL090C	PDR1 , RPN4 , RPS6A
Pdr1	YOL077W-A	PDR1 , RPN4 , YAP1 , HAC1 , ATP19
Pdr1	YDL223C	PDR1 , HBT1
Pdr1	YDR470C	PDR1 , NRG1 , RSF2 , UGO1
Pdr1	YCL065W	PDR1 , RPN4 , YAP1 , SFP1 , YCL065W
Pdr1	YOR274W	PDR1 , RPN4 , YAP1 , HAC1 , MOD5
Pdr1	YOL080C	PDR1 , RPN4 , YAP1 , SFP1 , REX4
Pdr1	YOR369C	PDR1 , RPN4 , RPS12
Pdr1	YIL128W	PDR1 , RPN4 , MGA1 , MSN4 , MET18
Pdr1	YOR319W	PDR1 , RPN4 , TOS8 , HSH49
Pdr1	YJL225C	PDR1 , HAP4 , GCN4 , MET4 , YJL225C
Pdr1	YGL136C	PDR1 , RPN4 , YAP1 , AFT1 , MRM2
Pdr1	YPL143W	PDR1 , RPN4 , RPL33A
Pdr1	YHR091C	PDR1 , HAP4 , GCN4 , SUM1 , MSR1
Pdr1	YFL064C	PDR1 , RPN4 , YAP1 , AFT1 , YFL064C
Pdr1	YPL059W	PDR1 , RPN4 , YAP1 , GRX5
Pdr1	YML132W	PDR1 , HAP4 , GCN4 , MET4 , COS3
Pdr1	YHR021C	PDR1 , RPN4 , RPS27B
Pdr1	YDL082W	PDR1 , RPL13A
Pdr1	YFL063W	PDR1 , RPN4 , YAP1 , YFL063W
Pdr1	YLR466W	PDR1 , RPN4 , YAP1 , SFP1 , YRF1-4
Pdr1	YJL136C	PDR1 , RPN4 , RPS21B
Pdr1	YDR544C	PDR1 , RPN4 , YAP1 , YDR544C
Pdr1	YER117W	PDR1 , RPN4 , RPL23B
Pdr1	YLR406C	PDR1 , RPN4 , RPL31B
Pdr1	YBL112C	PDR1 , HAP4 , GCN4 , MET4 , YBL112C
Pdr1	YFL034W	PDR1 , RPN4 , YAP1 , YFL034W
Pdr1	YCL068C	PDR1 , HAP4 , GCN4 , MET4 , YCL068C
Pdr1	YGL115W	PDR1 , HAP4 , GCN4 , SNF4
Pdr1	YIL149C	PDR1 , HAP4 , GCN4 , MET4 , MLP2
Pdr1	YNL336W	PDR1 , HAP4 , GCN4 , MET4 , COS1
Pdr1	YGL189C	PDR1 , RPN4 , RPS26A
Pdr1	YDR342C	PDR1 , HXT7
Pdr1	YEL054C	PDR1 , RPN4 , RPL12A
Pdr1	YOR307C	PDR1 , RPN4 , YAP1 , SFP1 , SLY41
Pdr1	YLR467W	PDR1 , HAP4 , GCN4 , MET4 , ACE2 , YRF1-5
Pdr1	YER116C	PDR1 , RPN4 , YAP1 , RAP1 , SLX8
Pdr1	YER056C-A	PDR1 , HAP4 , GCN4 , RPL34A
Pdr1	YDR368W	PDR1 , RPN4 , YAP1 , YPR1
Pdr1	YOR236W	PDR1 , RPN4 , XBP1 , DFR1
Pdr1	YDL115C	PDR1 , RPN4 , YAP1 , SFP1 , IWR1
Pdr1	YOR323C	PDR1 , HAP4 , GCN4 , PRO2
Pdr1	YHR021W-A	PDR1 , RPN4 , YAP1 , MSN2 , ECM12
Pdr1	YAL022C	PDR1 , HAP4 , YOX1 , FUN26
Pdr1	YLR047C	PDR1 , RPN4 , YAP1 , FRE8
Pdr1	YLR207W	PDR1 , RPN4 , YAP1 , SFP1 , HRD3
Pdr1	YLR407W	PDR1 , RPN4 , YAP1 , SFP1 , YLR407W
Pdr1	YDL148C	PDR1 , RPN4 , YAP1 , SFP1 , NOP14
Mot3	YEL055C	MOT3 , MIG3 , MIG1 , ADR1 , TEC1 , SFP1 , POL5
Mot3	YDR065W	MOT3 , MIG3 , MIG1 , ADR1 , TEC1 , SFP1 , HSF1 , YDR065W
Mot3	YBR106W	MOT3 , MIG3 , MIG1 , ADR1 , PDR1 , RPN4 , PHO88
Mot3	YBR294W	MOT3 , HMS1 , SUL1
Mot3	YIL096C	MOT3 , MIG3 , MIG1 , ADR1 , TEC1 , SFP1 , YIL096C
Mot3	YBR090C	MOT3 , MIG3 , MIG1 , ADR1 , TEC1 , SFP1 , HSF1 , YBR090C
Mot3	YKL165C	MOT3 , MIG3 , MIG1 , GAL4 , ZAP1 , MCD4
Mot3	YBR083W	MOT3 , MIG3 , MIG1 , ADR1 , TEC1
Mot3	YDR339C	MOT3 , MIG3 , MIG1 , ADR1 , TEC1 , SFP1 , FCF1
Mot3	YOR042W	MOT3 , MIG3 , MIG1 , ADR1 , TEC1 , SFP1 , CUE5
Mot3	YBR056W	MOT3 , MIG3 , MIG1 , ADR1 , TEC1 , SFP1 , YBR056W
Mot3	YBR105C	MOT3 , MIG3 , MIG1 , NRG1 , XBP1 , VID24
Mot3	YER137C	MOT3 , MIG3 , MIG1 , ADR1 , TEC1 , SFP1 , YER137C
Mot3	YBL022C	MOT3 , MIG3 , MIG1 , ADR1 , TEC1 , SFP1 , PIM1
Mot3	YDL063C	MOT3 , MIG3 , MIG1 , ADR1 , TEC1 , SFP1 , YDL063C
Mot3	YKL127W	MOT3 , MIG3 , MIG1 , GAL4 , MGA1 , KAR4 , PGM1
Mot3	YIL099W	MOT3 , SGA1
Mot3	YIL119C	MOT3 , MIG3 , MIG1 , RPI1
Mot3	YGL190C	MOT3 , MIG3 , MIG1 , GAL4 , MGA1 , MSN4 , MSN2 , CDC55
Mot3	YDR278C	MOT3 , MIG3 , MIG1 , ADR1 , TEC1 , SFP1 , YAP1 , YDR278C
Mot3	YBR012W-B	MOT3 , MIG3 , MIG1 , ADR1 , TEC1 , SFP1 , GCR1 , YBR012W-B
Mot3	YBR119W	MOT3 , MIG3 , MIG1 , ADR1 , TEC1 , SFP1 , MUD1
Mot3	YDR340W	MOT3 , MIG3 , MIG1 , GAL4 , MGA1 , KAR4 , YDR340W
Mot3	YAL004W	MOT3 , MIG3 , MIG1 , ADR1 , TEC1 , SFP1 , AFT1 , YAL004W
Mot3	YJR159W	MOT3 , MIG3 , MIG1 , NRG1 , RSF2 , HAP4 , SOR1
Mot3	YDR420W	MOT3 , MIG3 , MIG1 , ADR1 , TEC1 , SFP1 , HKR1
Mot3	YBR012W-A	MOT3 , MIG3 , MIG1 , ADR1 , TEC1 , SFP1 , GCR1 , YBR012W-A
Mot3	YHR185C	MOT3 , MIG3 , MIG1 , ADR1 , TEC1 , SFP1 , IFH1 , PFS1
Mot3	YAL059W	MOT3 , MIG3 , MIG1 , ADR1 , ECM1
Mot3	YJL162C	MOT3 , MIG3 , MIG1 , GAL4 , MGA1 , KAR4 , JJJ2
Mot3	YDR023W	MOT3 , MIG3 , MIG1 , ADR1 , TEC1 , SFP1 , SES1
Mot3	YML071C	MOT3 , MIG3 , MIG1 , ADR1 , TEC1 , SFP1 , CAD1 , MET4 , COG8
Mot3	YBR032W	MOT3 , MIG3 , MIG1 , ADR1 , TEC1 , SFP1 , GCR1 , YBR032W
Mot3	YDL044C	MOT3 , MIG3 , MIG1 , MTF2
Mot3	YBL020W	MOT3 , MIG3 , MIG1 , ADR1 , TEC1 , SFP1 , RFT1
Mot3	YFR016C	MOT3 , MIG3 , MIG1 , ADR1 , TEC1 , SFP1 , ARR1 , YFR016C
Mot3	YPL130W	MOT3 , HMS1 , SPO19
Mot3	YBR012C	MOT3 , MIG3 , MIG1 , ADR1 , TEC1 , SFP1 , AFT2 , YBR012C
Mot3	YBR097W	MOT3 , MIG3 , MIG1 , ADR1 , TEC1 , SFP1 , VPS15
Mot3	YKR073C	MOT3 , MIG3 , MIG1 , GAL4 , MGA1 , MSN4 , MSN2 , YKR073C
Mot3	YIR020C	MOT3 , MIG3 , MIG1 , ADR1 , TEC1 , SFP1 , CAD1 , YIR020C
Mot3	YDR022C	MOT3 , MIG3 , MIG1 , ADR1 , TEC1 , SFP1 , CIS1
Mot3	YIL095W	MOT3 , MIG3 , MIG1 , ADR1 , TEC1 , SFP1 , HSF1 , PRK1
Mot3	YEL070W	MOT3 , MIG3 , MIG1 , DSF1
Mot3	YJL148W	MOT3 , MIG3 , MIG1 , ADR1 , TEC1 , SFP1 , RPA34
Mot3	YMR106C	MOT3 , MIG3 , MIG1 , ADR1 , PDR1 , RPN4 , YKU80
Mot3	YAR073W	MOT3 , MIG3 , MIG1 , ADR1 , PDR1 , RPN4 , IMD1
Mot3	YBL021C	MOT3 , MIG3 , MIG1 , ADR1 , TEC1 , SFP1 , CAD1 , HAP3
Mot3	YLR035C	MOT3 , MIG3 , MIG1 , GAL4 , MLH2
Mot3	YBL029W	MOT3 , HMS1 , YBL029W
Mot3	YAR075W	MOT3 , MIG3 , MIG1 , ADR1 , YAR075W
Mot3	YBR013C	MOT3 , MIG3 , MIG1 , GAL4 , MGA1 , MSN4 , MSN2 , STP2 , YBR013C
Mot3	YOL121C	MOT3 , MIG3 , MIG1 , ADR1 , PDR1 , RPN4 , RPS19A
Mot3	YJR158W	MOT3 , MIG3 , MIG1 , NRG1 , RSF2 , HAP4 , HXT16
Mot3	YBR275C	MOT3 , MIG3 , MIG1 , ADR1 , TEC1 , SFP1 , YAP1 , RIF1
Mot3	YOL022C	MOT3 , HMS1 , YOL022C
Mot3	YEL069C	MOT3 , MIG3 , MIG1 , HXT13
Stb5	YBR156C	STB5 , YOX1 , NRG1 , SLI15
Stb5	YDR287W	STB5 , YOX1 , MGA1 , MSN4 , MSN2 , STP2 , INM2
Stb5	YOR214C	STB5 , YOX1 , SWI4 , YHP1 , RME1 , YOR214C
Stb5	YFR007W	STB5 , YOX1 , MGA1 , MSN4 , RPN4 , YAP1 , GIS2 , YFH7
Stb5	YDR010C	STB5 , YOX1 , NRG1 , RSF2 , HAP4 , GCN4 , MET4 , YDR010C
Stb5	YER172C	STB5 , YOX1 , SWI4 , ADR1 , TEC1 , SFP1 , GCR1 , BRR2
Stb5	YHR156C	STB5 , YOX1 , SWI4 , ADR1 , TEC1 , LIN1
Stb5	YHR183W	STB5 , YOX1 , SWI4 , ADR1 , TEC1 , SFP1 , GND1
Stb5	YGR289C	STB5 , YOX1 , HMS1 , MAL13 , MAL11
Stb5	YOR252W	STB5 , YOX1 , NRG1 , XBP1 , YRR1 , PDR3 , TMA16
Stb5	YHR162W	STB5 , YOX1 , YPR015C , YHR162W
Stb5	YDR179C	STB5 , YOX1 , NRG1 , XBP1 , YRR1 , CSN9
Stb5	YHR157W	STB5 , YOX1 , MGA1 , MSN4 , HAC1 , REC104
Stb5	YDR221W	STB5 , YOX1 , SWI4 , ADR1 , TEC1 , SFP1 , GTB1
Stb5	YDR165W	STB5 , YOX1 , MGA1 , MSN4 , MSN2 , TRM82
Stb5	YJL216C	STB5 , YOX1 , SWI4 , ADR1 , PDR1 , YJL216C
Stb5	YLR401C	STB5 , YOX1 , MGA1 , MSN4 , MSN2 , DUS3
Stb5	YDR212W	STB5 , YOX1 , SWI4 , TCP1
Stb5	YHR028C	STB5 , YOX1 , NRG1 , RSF2 , HAP4 , GCN4 , DAP2
Stb5	YDR232W	STB5 , YOX1 , MGA1 , MSN4 , MSN2 , HEM1
Stb5	YJR099W	STB5 , YOX1 , SWI4 , ADR1 , PIP2 , RSC30 , YUH1
Stb5	YBL018C	STB5 , YOX1 , SWI4 , ADR1 , TEC1 , SFP1 , POP8
Stb5	YNL273W	STB5 , YOX1 , NRG1 , RSF2 , HAP4 , GCN4 , TOF1
Stb5	YOR251C	STB5 , YOX1 , MGA1 , MSN4 , RPN4 , YAP1 , YOR251C
Stb5	YOR074C	STB5 , YOX1 , SWI4 , CDC21
Stb5	YKL077W	STB5 , YOX1 , MGA1 , MSN4 , RPN4 , YAP1 , YKL077W
Stb5	YHR161C	STB5 , YOX1 , MGA1 , MSN4 , MSN2 , YAP1801
Stb5	YIL159W	STB5 , YOX1 , SWI4 , YHP1 , RME1 , MET32 , BNR1
Stb5	YPR074C	STB5 , YOX1 , SWI4 , ADR1 , TEC1 , SFP1 , TKL1
Stb5	YLR354C	STB5 , YOX1 , MGA1 , MSN4 , RPN4 , YAP1 , TAL1
Stb5	YLR152C	STB5 , YOX1 , NRG1 , XBP1 , YRR1 , PDR3 , YLR152C
Stb5	YLR402W	STB5 , YOX1 , SWI4 , ADR1 , TEC1 , SFP1 , YLR402W
Stb5	YKL177W	STB5 , YOX1 , SWI4 , ADR1 , TEC1 , SFP1 , YKL177W
Stb5	YER173W	STB5 , YOX1 , SWI4 , ADR1 , TEC1 , SFP1 , RAD24
Stb5	YDR011W	STB5 , YOX1 , NRG1 , XBP1 , YRR1 , SNQ2
Stb5	YHR155W	STB5 , YOX1 , MGA1 , MSN4 , RPN4 , YAP1 , YSP1
Stb5	YPL061W	STB5 , YOX1 , NRG1 , RSF2 , ALD6
Stb5	YOR075W	STB5 , YOX1 , SWI4 , ADR1 , TEC1 , SFP1 , UFE1
Stb5	YDR286C	STB5 , YOX1 , NRG1 , YDR286C
Stb5	YJL008C	STB5 , YOX1 , SWI4 , ADR1 , PDR1 , CCT8
Stb5	YHR184W	STB5 , YOX1 , NRG1 , RSF2 , HAP4 , SSP1
Stb5	YBR281C	STB5 , YOX1 , MGA1 , MSN4 , RPN4 , YAP1 , DUG2
Stb5	YDR179W-A	STB5 , YOX1 , MGA1 , MSN4 , MSN2 , YDR179W-A
Stb5	YBR185C	STB5 , YOX1 , MGA1 , MSN4 , MBA1
Stb5	YGR150C	STB5 , YOX1 , NRG1 , RSF2 , HAP4 , GCN4 , YGR150C
Stb5	YMR156C	STB5 , YOX1 , SWI4 , HAP5 , CAT8 , TPP1
Stb5	YGR093W	STB5 , YOX1 , MGA1 , STE12 , YGR093W
Stb5	YDR248C	STB5 , YOX1 , SWI4 , ADR1 , TEC1 , SFP1 , HSF1 , YDR248C
Stb5	YBR282W	STB5 , YOX1 , MGA1 , MSN4 , HAC1 , MRPL27
Stb5	YPL113C	STB5 , YOX1 , NRG1 , YPL113C
Stb5	YLR200W	STB5 , YOX1 , MGA1 , MSN4 , HAC1 , YKE2
Stb5	YDL108W	STB5 , YOX1 , SWI4 , ADR1 , PDR1 , KIN28
Stb5	YNL274C	STB5 , YOX1 , NRG1 , GOR1
Stb5	YOR256C	STB5 , YOX1 , NRG1 , XBP1 , YRR1 , TRE2
Stb5	YKL014C	STB5 , YOX1 , SWI4 , ADR1 , TEC1 , SFP1 , URB1
Stb5	YGR022C	STB5 , YOX1 , MIG3 , MIG1 , GAL4 , YGR022C
Stb5	YPR076W	STB5 , YOX1 , SWI4 , ADR1 , TEC1 , SFP1 , ARR1 , CDC14 , YPR076W
Stb5	YIL160C	STB5 , YOX1 , NRG1 , XBP1 , POT1
Stb5	YDL091C	STB5 , YOX1 , NRG1 , UBX3
Stb5	YHR123W	STB5 , YOX1 , MGA1 , MSN4 , MSN2 , AZF1 , EPT1
Stb5	YOR257W	STB5 , YOX1 , SWI4 , ADR1 , TEC1 , SFP1 , CDC31
Stb5	YEL041W	STB5 , YOX1 , SWI4 , ADR1 , YEF1
Stb5	YMR272C	STB5 , YOX1 , NRG1 , XBP1 , YRR1 , PDR3 , SCS7
Stb5	YAR009C	STB5 , YOX1 , MGA1 , MSN4 , RPN4 , YAP1 , YAR009C
Stb5	YLR199C	STB5 , YOX1 , MGA1 , MSN4 , RPN4 , PBA1
Stb5	YDL049C	STB5 , YOX1 , SWI4 , ADR1 , TEC1 , SFP1 , KNH1
Stb5	YDR231C	STB5 , YOX1 , MGA1 , MSN4 , COX20
Stb5	YGR218W	STB5 , YOX1 , MGA1 , MSN4 , RPN4 , YAP1 , RLM1 , CRM1
Stb5	YPR073C	STB5 , YOX1 , MGA1 , MSN4 , RPN4 , YAP1 , IFH1 , LTP1
Stb5	YER138C	STB5 , YOX1 , MGA1 , MSN4 , RPN4 , YAP1 , YER138C
Stb5	YJR098C	STB5 , YOX1 , SWI4 , ADR1 , TEC1 , SFP1 , YJR098C
Stb5	YOR166C	STB5 , YOX1 , NRG1 , XBP1 , YRR1 , SWT1
Stb5	YOR087W	STB5 , YOX1 , MGA1 , MSN4 , YVC1
Stb5	YOL041C	STB5 , NOP12
Stb5	YDL235C	STB5 , YOX1 , MGA1 , MSN4 , YPD1
Stb5	YDR294C	STB5 , YOX1 , SWI4 , ADR1 , DPL1
Stb5	YOR086C	STB5 , YOX1 , SWI4 , ADR1 , TEC1 , SFP1 , ARR1 , TCB1
Stb5	YPR016C	STB5 , YOX1 , NRG1 , XBP1 , YRR1 , PDR3 , TIF6
Stb5	YMR315W	STB5 , YMR315W
Yox1	YER033C	YOX1 , MGA1 , MSN4 , RPN4 , ZRG8
Yox1	YJL030W	YOX1 , MGA1 , MSN4 , RPN4 , YAP1 , MAD2
Yox1	YDR041W	YOX1 , NRG1 , RSM10
Yox1	YCR096C	YOX1 , MGA1 , MSN4 , HAC1 , HMRA2
Yox1	YEL032W	YOX1 , NRG1 , RSF2 , HAP4 , GCN4 , MCM3
Yox1	YER002W	YOX1 , SWI4 , ADR1 , TEC1 , SFP1 , NOP16
Yox1	YLR048W	YOX1 , MGA1 , MSN4 , RPN4 , RPS0B
Yox1	YDR190C	YOX1 , MGA1 , STE12 , RVB1
Yox1	YJL191W	YOX1 , MGA1 , MSN4 , RPN4 , YAP1 , RPS14B
Yox1	YBR099C	YOX1 , MGA1 , MSN4 , RPN4 , YBR099C
Yox1	YGR273C	YOX1 , NRG1 , RSF2 , HAP4 , GCN4 , SUM1 , YGR273C
Yox1	YCR019W	YOX1 , MGA1 , MSN4 , RPN4 , MAK32
Yox1	YJR011C	YOX1 , SWI4 , ADR1 , TEC1 , SFP1 , YJR011C
Yox1	YPL106C	YOX1 , MGA1 , SSE1
Yox1	YJL139C	YOX1 , NRG1 , RSF2 , HAP4 , GCN4 , LEU3 , YUR1
Yox1	YDR191W	YOX1 , HST4
Yox1	YLR261C	YOX1 , SWI4 , ADR1 , TEC1 , SFP1 , VPS63
Yox1	YDR003W	YOX1 , MGA1 , MSN4 , RPN4 , YAP1 , RCR2
Yox1	YDR495C	YOX1 , SWI4 , ADR1 , TEC1 , SFP1 , VPS3
Yox1	YHR182W	YOX1 , MGA1 , MSN4 , MSN2 , STP2 , YHR182W
Yox1	YPL217C	YOX1 , NRG1 , XBP1 , YRR1 , PDR3 , BMS1
Yox1	YDR144C	YOX1 , NRG1 , RSF2 , HAP4 , GCN4 , MKC7
Yox1	YLR254C	YOX1 , NRG1 , RSF2 , HAP4 , GCN4 , MET4 , NDL1
Yox1	YIL119C	YOX1 , NRG1 , RPI1
Yox1	YDR278C	YOX1 , MGA1 , MSN4 , RPN4 , YAP1 , YDR278C
Yox1	YJR094C	YOX1 , SWI4 , ADR1 , IME1
Yox1	YBR202W	YOX1 , MCM7
Yox1	YDL068W	YOX1 , NRG1 , RSF2 , HAP4 , GCN4 , MET4 , YDL068W
Yox1	YDR434W	YOX1 , SWI4 , ADR1 , TEC1 , SFP1 , GPI17
Yox1	YNL146W	YOX1 , MGA1 , MSN4 , YNL146W
Yox1	YHR085W	YOX1 , NRG1 , RSF2 , PHO4 , IPI1
Yox1	YIR005W	YOX1 , NRG1 , RSF2 , HAP4 , GCN4 , IST3
Yox1	YJL203W	YOX1 , SWI4 , ADR1 , TEC1 , SFP1 , PRP21
Yox1	YOR058C	YOX1 , MGA1 , MSN4 , RPN4 , YAP1 , ASE1
Yox1	YJL031C	YOX1 , MGA1 , MSN4 , RPN4 , YAP1 , BET4
Yox1	YPL216W	YOX1 , HMS1 , YPL216W
Yox1	YER013W	YOX1 , SWI4 , ADR1 , TEC1 , SFP1 , PRP22
Yox1	YKR056W	YOX1 , MGA1 , STE12 , TRM2
Yox1	YLR273C	YOX1 , MGA1 , MSN4 , RPN4 , PIG1
Yox1	YDR040C	YOX1 , MIG2 , ENA1
Yox1	YOL159C	YOX1 , MGA1 , MSN4 , RPN4 , YAP1 , AFT1 , YOL159C
Yox1	YHR043C	YOX1 , MIG2 , DOG2
Yox1	YLR023C	YOX1 , MGA1 , STE12 , IZH3
Yox1	YNL002C	YOX1 , MGA1 , MSN4 , MSN2 , RLP7
Yox1	YNL145W	YOX1 , SWI4 , MFA2
Yox1	YMR193W	YOX1 , SWI4 , ADR1 , TEC1 , SFP1 , ARR1 , MRPL24
Yox1	YER072W	YOX1 , SWI4 , ADR1 , VTC1
Yox1	YJL175W	YOX1 , MGA1 , MSN4 , RPN4 , YAP1 , YJL175W
Yox1	YCL054W	YOX1 , SWI4 , ADR1 , SPB1
Yox1	YER135C	YOX1 , NRG1 , RSF2 , HAP4 , GCN4 , GLN3 , YER135C
Yox1	YDR077W	YOX1 , SWI4 , ADR1 , SED1
Yox1	YPL188W	YOX1 , NRG1 , RSF2 , HAP4 , GCN4 , POS5
Yox1	YLR428C	YOX1 , MGA1 , MSN4 , RPN4 , YAP1 , YLR428C
Yox1	YBR089W	YOX1 , MGA1 , MSN4 , RPN4 , YAP1 , YBR089W
Yox1	YDR496C	YOX1 , NRG1 , XBP1 , YRR1 , PDR3 , PUF6
Yox1	YHR152W	YOX1 , SPO12
Yox1	YGL001C	YOX1 , MGA1 , MSN4 , RPN4 , UPC2 , ERG26
Yox1	YPL051W	YOX1 , SWI4 , ADR1 , ARL3
Yox1	YMR098C	YOX1 , SWI4 , ADR1 , TEC1 , SFP1 , ARR1 , ATP25
Yox1	YKR042W	YOX1 , UTH1
Yox1	YJL196C	YOX1 , YPR015C , ELO1
Yox1	YAR018C	YOX1 , KIN3
Yox1	YMR019W	YOX1 , NRG1 , RSF2 , HAP4 , GCN4 , STB4
Yox1	YER034W	YOX1 , SWI4 , ADR1 , TEC1 , SFP1 , YER034W
Yox1	YDR042C	YOX1 , SWI4 , ADR1 , TEC1 , SFP1 , YDR042C
Yox1	YHR099W	YOX1 , SWI4 , ADR1 , PIP2 , RSC30 , TRA1
Yox1	YGR072W	YOX1 , MGA1 , MSN4 , MSN2 , STP2 , UPF3
Yox1	YLR274W	YOX1 , MCM5
Yox1	YMR194W	YOX1 , SWI4 , ADR1 , TEC1 , SFP1 , RPL36A
Yox1	YOR066W	YOX1 , MSA1
Yox1	YJR051W	YOX1 , MGA1 , MSN4 , RPN4 , YAP1 , OSM1
Yox1	YGR218W	YOX1 , MGA1 , MSN4 , RPN4 , YAP1 , RLM1 , CRM1
Yox1	YDR034C-A	YOX1 , MGA1 , STE12 , YDR034C-A
Yox1	YOL003C	YOX1 , SWI4 , ADR1 , TEC1 , SFP1 , PFA4
Yox1	YJL194W	YOX1 , CDC6
Yox1	YMR258C	YOX1 , MGA1 , MSN4 , RPN4 , YMR258C
Yox1	YGR092W	YOX1 , DBF2
Yox1	YNL258C	YOX1 , NRG1 , RSF2 , HAP4 , GCN4 , DSL1
Yox1	YOL115W	YOX1 , SWI4 , ADR1 , PAP2
Yox1	YCR024C-A	YOX1 , MGA1 , MSN4 , RPN4 , PMP1
Yox1	YOR148C	YOX1 , NRG1 , RSF2 , HAP4 , GCN4 , OAF1 , SPP2
Yox1	YLR047C	YOX1 , MGA1 , MSN4 , RPN4 , YAP1 , FRE8
Yox1	YNL070W	YOX1 , MGA1 , MSN4 , HAC1 , TOM7
Rox1	YFR040W	ROX1 , XBP1 , YRR1 , YAP1 , SAP155
Rox1	YDL147W	ROX1 , ADR1 , TEC1 , SFP1 , RPN5
Rox1	YNL097C	ROX1 , XBP1 , YRR1 , YAP1 , PHO23
Rox1	YGL123W	ROX1 , HAP4 , GCN4 , RPS2
Rox1	YGL012W	ROX1 , ERG4
Rox1	YAR023C	ROX1 , ADR1 , TEC1 , SFP1 , RME1 , YAR023C
Rox1	YJL148W	ROX1 , HAP4 , GCN4 , MET4 , RPA34
Rox1	YML124C	ROX1 , ADR1 , TEC1 , SFP1 , TUB3
Rox1	YKL044W	ROX1 , ADR1 , YKL044W
Rox1	YMR014W	ROX1 , HAP4 , GCN4 , MSN2 , BUD22
Rox1	YDL184C	ROX1 , HAP4 , GCN4 , LEU3 , RPL41A
Rox1	YPL220W	ROX1 , HAP4 , GCN4 , MET4 , RPL1A
Rox1	YDR372C	ROX1 , SUT1 , IFH1 , VPS74
Rox1	YHR193C	ROX1 , EGD2
Rox1	YDR340W	ROX1 , HAP4 , YOX1 , KAR4 , YDR340W
Rox1	YBL099W	ROX1 , HAP4 , GCN4 , MET4 , ATP1
Rox1	YPR013C	ROX1 , XBP1 , YRR1 , YAP1 , YPR013C
Rox1	YGR256W	ROX1 , ADR1 , GND2
Rox1	YDR085C	ROX1 , UPC2 , MIG3 , MIG1 , AFR1
Rox1	YFR016C	ROX1 , HAP4 , GCN4 , MET4 , YFR016C
Rox1	YER101C	ROX1 , HAP4 , GCN4 , MET4 , AST2
Rox1	YIL056W	ROX1 , ADR1 , PDR1 , VHR1
Rox1	YKR102W	ROX1 , HAP4 , GCN4 , MSN2 , FLO10
Rox1	YPL130W	ROX1 , UPC2 , HMS1 , SPO19
Rox1	YBL098W	ROX1 , HAP4 , GCN4 , BNA4
Rox1	YDR259C	ROX1 , ADR1 , YAP6
Rox1	YDR471W	ROX1 , SUT1 , IFH1 , RPL27B
Rox1	YGL013C	ROX1 , ADR1 , PDR1
Rox1	YDR363W	ROX1 , HAP4 , GCN4 , ESC2
Rox1	YJL219W	ROX1 , HAP4 , YOX1 , KAR4 , HXT9
Rox1	YDL246C	ROX1 , SOR2
Rox1	YGR124W	ROX1 , HAP4 , GCN4 , ASN2
Rox1	YJL221C	ROX1 , HAP4 , FSP2
Rox1	YBR230C	ROX1 , ADR1 , PDR1 , OM14
Rox1	YDR343C	ROX1 , HAP4 , HXT6
Rox1	YER158C	ROX1 , HAP4 , YER158C
Rox1	YER045C	ROX1 , HAP4 , GCN4 , ACA1
Rox1	YPL018W	ROX1 , ADR1 , CTF19
Rox1	YDL061C	ROX1 , HAP4 , GCN4 , MET4 , RPS29B
Rox1	YDR339C	ROX1 , ADR1 , TEC1 , SFP1 , FCF1
Rox1	YDR152W	ROX1 , HAP4 , GCN4 , GIR2
Rox1	YOR042W	ROX1 , ADR1 , TEC1 , SFP1 , CUE5
Rox1	YER102W	ROX1 , HAP4 , GCN4 , MET4 , RPS8B
Rox1	YPL198W	ROX1 , HAP4 , GCN4 , MET4 , RPL7B
Rox1	YOL156W	ROX1 , HAP4 , GCN4 , MET4 , HXT11
Rox1	YDR064W	ROX1 , HAP4 , GCN4 , RPS13
Rox1	YKL127W	ROX1 , HAP4 , YOX1 , KAR4 , PGM1
Rox1	YEL040W	ROX1 , HAP4 , UTR2
Rox1	YIL119C	ROX1 , NRG2 , RPI1
Rox1	YLR034C	ROX1 , ADR1 , TEC1 , SFP1 , AFT2 , SMF3
Rox1	YDR278C	ROX1 , XBP1 , YRR1 , YAP1 , YDR278C
Rox1	YJR094C	ROX1 , HAP4 , IME1
Rox1	YIL135C	ROX1 , HAP4 , GCN4 , MET4 , VHS2
Rox1	YNL111C	ROX1 , CYB5
Rox1	YIL099W	ROX1 , SGA1
Rox1	YHR185C	ROX1 , SUT1 , IFH1 , PFS1
Rox1	YDR023W	ROX1 , HAP4 , GCN4 , MET4 , SES1
Rox1	YHL034C	ROX1 , HAP4 , GCN4 , MSN2 , SBP1
Rox1	YGL135W	ROX1 , SUT1 , IFH1 , RPL1B
Rox1	YPL230W	ROX1 , ADR1 , USV1
Rox1	YML056C	ROX1 , ADR1 , IMD4
Rox1	YGL029W	ROX1 , HAP4 , GCN4 , CGR1
Rox1	YMR319C	ROX1 , FET4
Rox1	YCR073C	ROX1 , HAP4 , GCN4 , LEU3 , SSK22
Rox1	YOR272W	ROX1 , XBP1 , YRR1 , PDR3 , YTM1
Rox1	YNR050C	ROX1 , LYS9
Rox1	YOR223W	ROX1 , HAP4 , GCN4 , LEU3 , YOR223W
Rox1	YDL245C	ROX1 , HAP4 , GCN4 , MSN2 , HXT15
Rox1	YGR084C	ROX1 , HAP4 , GCN4 , MRP13
Rox1	YAR068W	ROX1 , ADR1 , YAR068W
Rox1	YER098W	ROX1 , HAP4 , GCN4 , MSN2 , UBP9
Rox1	YDR373W	ROX1 , SUT1 , IFH1 , FRQ1
Rox1	YIR020C	ROX1 , ADR1 , TEC1 , SFP1 , CAD1 , YIR020C
Rox1	YPR160W	ROX1 , GPH1
Rox1	YOL121C	ROX1 , XBP1 , YRR1 , RPN4 , RPS19A
Rox1	YGR027C	ROX1 , HAP4 , GCN4 , RPS25A
Rox1	YEL055C	ROX1 , HAP4 , GCN4 , POL5
Rox1	YLR406C	ROX1 , HAP4 , GCN4 , RPL31B
Rox1	YFL039C	ROX1 , HAP4 , GCN4 , ACT1
Rox1	YLR256W-A	ROX1 , ADR1 , TEC1 , SFP1 , ARR1 , CDC14 , YLR256W-A
Rox1	YML103C	ROX1 , HAP4 , GCN4 , MET4 , NUP188
Rox1	YLR075W	ROX1 , XBP1 , YRR1 , YAP1 , RPL10
Rox1	YMR017W	ROX1 , ADR1 , SPO20
Rox1	YLR035C-A	ROX1 , HAP4 , YOX1 , SWI4 , YLR035C-A
Rox1	YDR441C	ROX1 , HAP4 , GCN4 , APT2
Rox1	YLR256W	ROX1 , HAP1
Rox1	YEL070W	ROX1 , UPC2 , DSF1
Rox1	YKL057C	ROX1 , ADR1 , TEC1 , SFP1 , NUP120
Rox1	YDL060W	ROX1 , ADR1 , TEC1 , SFP1 , TSR1
Rox1	YER074W	ROX1 , HAP4 , GCN4 , RPS24A
Rox1	YLR043C	ROX1 , HAP4 , GCN4 , MET4 , TRX1
Rox1	YCR065W	ROX1 , HAP4 , YOX1 , SWI4 , HCM1
Rox1	YGL236C	ROX1 , HAP4 , GCN4 , MET4 , MTO1
Rox1	YDR470C	ROX1 , NRG2 , RSF2 , UGO1
Rox1	YPL019C	ROX1 , ADR1 , PHO4 , VTC3
Rox1	YER011W	ROX1 , TIR1
Rox1	YCR063W	ROX1 , HAP4 , GCN4 , LEU3 , BUD31
Rox1	YJL039C	ROX1 , HAP4 , GCN4 , NUP192
Rox1	YDR042C	ROX1 , YDR042C
Rox1	YLL027W	ROX1 , HAP4 , GCN4 , ISA1
Rox1	YGL136C	ROX1 , SUT1 , IFH1 , MRM2
Rox1	YLR074C	ROX1 , HAP4 , GCN4 , BUD20
Rox1	YPL143W	ROX1 , HAP4 , GCN4 , RPL33A
Rox1	YMR135C	ROX1 , HAP4 , GCN4 , LEU3 , GID8
Rox1	YPR010C	ROX1 , ADR1 , RPA135
Rox1	YAL034C	ROX1 , HAP4 , GCN4 , MSN2 , FUN19
Rox1	YDR077W	ROX1 , ADR1 , SED1
Rox1	YFR039C	ROX1 , HAP4 , CAT8 , YFR039C
Rox1	YAR009C	ROX1 , XBP1 , YRR1 , YAP1 , YAR009C
Rox1	YER137C	ROX1 , HAP4 , GCN4 , LEU3 , YER137C
Rox1	YDL045W-A	ROX1 , HAP4 , GCN4 , MET4 , HAC1 , MRP10
Rox1	YEL060C	ROX1 , ADR1 , PDR1 , PRB1
Rox1	YOR278W	ROX1 , HAP4 , GCN4 , HEM4
Rox1	YJR159W	ROX1 , HAP4 , SOR1
Rox1	YDR362C	ROX1 , ADR1 , TEC1 , SFP1 , TFC6
Rox1	YML071C	ROX1 , HAP4 , GCN4 , MET4 , COG8
Rox1	YDL024C	ROX1 , ADR1 , DIA3
Rox1	YOL157C	ROX1 , UPC2 , YOL157C
Rox1	YJL045W	ROX1 , YJL045W
Rox1	YGL234W	ROX1 , HAP4 , GCN4 , ADE5
Rox1	YIL102C	ROX1 , HAP4 , GCN4 , MET4 , YIL102C
Rox1	YLR368W	ROX1 , ADR1 , TEC1 , SFP1 , ARR1 , MDM30
Rox1	YER056C-A	ROX1 , HAP4 , GCN4 , RPL34A
Rox1	YKR073C	ROX1 , HAP4 , GCN4 , STP2 , YKR073C
Rox1	YOL155C	ROX1 , HPF1
Rox1	YMR136W	ROX1 , XBP1 , YRR1 , RPN4 , GAT2
Rox1	YOR236W	ROX1 , XBP1 , DFR1
Rox1	YNL034W	ROX1 , ADR1 , TEC1 , SFP1 , RME1 , YNL034W
Rox1	YDR524C	ROX1 , HAP4 , GCN4 , AGE1
Rox1	YOR315W	ROX1 , NRG2 , SFG1
Rox1	YEL047C	ROX1 , YEL047C
Rox1	YBL029W	ROX1 , UPC2 , YBL029W
Rox1	YLR354C	ROX1 , XBP1 , YRR1 , YAP1 , TAL1
Rox1	YML055W	ROX1 , HAP4 , GCN4 , SPC2
Rox1	YML102W	ROX1 , XBP1 , YRR1 , RPN4 , CAC2
Rox1	YGL195W	ROX1 , ADR1 , TEC1 , SFP1 , GCN1
Rox1	YLR407W	ROX1 , SUT1 , IFH1 , YLR407W
Rox1	YDL148C	ROX1 , ADR1 , TEC1 , SFP1 , NOP14
Mig3	YDR041W	MIG3 , MIG1 , NRG1 , RSM10
Mig3	YFR017C	MIG3 , MIG1 , ADR1 , PDR1 , YFR017C
Mig3	YAR050W	MIG3 , MIG1 , ADR1 , HMS1 , FLO1
Mig3	YDL214C	MIG3 , MIG1 , ADR1 , TEC1 , SFP1 , HSF1 , PRR2
Mig3	YHR033W	MIG3 , MIG1 , NRG1 , YHR033W
Mig3	YOL156W	MIG3 , MIG1 , GAL4 , MGA1 , MSN4 , HXT11
Mig3	YJR159W	MIG3 , MIG1 , NRG1 , RSF2 , HAP4 , SOR1
Mig3	YBR229C	MIG3 , MIG1 , ADR1 , TEC1 , SFP1 , YAP1 , ROT2
Mig3	YDL245C	MIG3 , MIG1 , GAL4 , MGA1 , MSN4 , HXT15
Mig3	YER189W	MIG3 , MIG1 , ADR1 , TEC1 , SFP1 , YAP1 , YER189W
Mig3	YBR012W-B	MIG3 , MIG1 , ADR1 , TEC1 , SFP1 , GCR1 , YBR012W-B
Mig3	YBR012W-A	MIG3 , MIG1 , ADR1 , TEC1 , SFP1 , GCR1 , YBR012W-A
Mig3	YLL004W	MIG3 , MIG1 , ADR1 , TEC1 , SFP1 , ORC3
Mig3	YBR099C	MIG3 , MIG1 , ADR1 , TEC1 , SFP1 , YBR099C
Mig3	YEL070W	MIG3 , MIG1 , DSF1
Mig3	YCR019W	MIG3 , MIG1 , ADR1 , TEC1 , SFP1 , MAK32
Mig3	YOL157C	MIG3 , MIG1 , YOL157C
Mig3	YOR236W	MIG3 , MIG1 , NRG1 , XBP1 , DFR1
Mig3	YJL148W	MIG3 , MIG1 , ADR1 , TEC1 , SFP1 , RPA34
Mig3	YDR040C	MIG3 , MIG1 , ENA1
Mig3	YDR042C	MIG3 , MIG1 , ADR1 , TEC1 , SFP1 , YDR042C
Mig3	YLL005C	MIG3 , MIG1 , ADR1 , TEC1 , SFP1 , HSF1 , SPO75
Mig3	YJL219W	MIG3 , MIG1 , GAL4 , MGA1 , HXT9
Mig3	YDL246C	MIG3 , MIG1 , ADR1 , PDR1 , RPN4 , SOR2
Mig3	YJL221C	MIG3 , MIG1 , ADR1 , PDR1 , FSP2
Mig3	YJR158W	MIG3 , MIG1 , NRG1 , RSF2 , HAP4 , HXT16
Mig3	YPR142C	MIG3 , MIG1 , ADR1 , TEC1 , SFP1 , STB5 , YPR142C
Mig3	YMR258C	MIG3 , MIG1 , ADR1 , PDR1 , RPN4 , YMR258C
Mig3	YDR343C	MIG3 , MIG1 , NRG1 , HXT6
Rtg1	YDR179W-A	RTG1 , NRG1 , RSF2 , HAP4 , GCN4 , YDR179W-A
Rtg1	YNL303W	RTG1 , NRG1 , XBP1 , YRR1 , RPN4 , ELP4 , YNL303W
Rtg1	YER057C	RTG1 , NRG1 , RSF2 , HAP4 , CAT8 , HMF1
Rtg1	YMR089C	RTG1 , NRG1 , XBP1 , YRR1 , YAP1 , YTA12
Rtg1	YNL188W	RTG1 , NRG1 , RSF2 , HAP4 , GCN4 , KAR1
Rtg1	YNL305C	RTG1 , NRG1 , XBP1 , YRR1 , RPN4 , YNL305C
Rtg1	YIL156W	RTG1 , NRG1 , XBP1 , YRR1 , YAP1 , UBP7
Rtg1	YBR245C	RTG1 , NRG1 , XBP1 , YRR1 , YAP1 , MSN2 , ISW1
Rtg1	YDR284C	RTG1 , NRG1 , XBP1 , YRR1 , YAP1 , SFP1 , DPP1
Rtg1	YDR285W	RTG1 , NRG1 , XBP1 , YRR1 , YAP1 , SFP1 , HSF1 , ZIP1
Rtg1	YBR275C	RTG1 , NRG1 , XBP1 , YRR1 , YAP1 , RIF1
Rtg1	YGL001C	RTG1 , NRG1 , RSF2 , HAP4 , GCN4 , ERG26
Rtg1	YAL028W	RTG1 , NRG1 , XBP1 , YRR1 , YAP1 , SFP1 , FRT2
Rtg1	YHL008C	RTG1 , NRG1 , XBP1 , YRR1 , YAP1 , SFP1 , YHL008C
Rtg1	YJR030C	RTG1 , NRG1 , RSF2 , HAP4 , GCN4 , MET4 , YJR030C
Rtg1	YDR299W	RTG1 , PDR3 , BFR2
Rtg1	YDR045C	RTG1 , NRG1 , XBP1 , YRR1 , YAP1 , SFP1 , RPC11
Rtg1	YDR473C	RTG1 , NRG1 , XBP1 , YRR1 , YAP1 , PRP3
Rtg1	YER142C	RTG1 , NRG1 , XBP1 , YRR1 , YAP1 , MAG1
Rtg1	YMR178W	RTG1 , NRG1 , XBP1 , YRR1 , YAP1 , SFP1 , YMR178W
Rtg1	YPL251W	RTG1 , NRG1 , XBP1 , YRR1 , RPN4 , YPL251W
Rtg1	YGR112W	RTG1 , NRG1 , XBP1 , MIG3 , MIG1 , SHY1
Rtg1	YKR098C	RTG1 , NRG1 , XBP1 , MIG3 , MIG1 , UBP11
Rtg1	YCR019W	RTG1 , NRG1 , XBP1 , YRR1 , RPN4 , MAK32
Rtg1	YPL253C	RTG1 , DAL80 , GZF3 , VIK1
Rtg1	YDL247W	RTG1 , NRG1 , XBP1 , YRR1 , YAP1 , AFT1 , MPH2
Rtg1	YDR394W	RTG1 , NRG1 , XBP1 , YRR1 , YAP1 , RPT3
Rtg1	YPL014W	RTG1 , NRG1 , RSF2 , HAP4 , GCN4 , RIM101 , YPL014W
Rtg1	YLR363C	RTG1 , NRG1 , RSF2 , HAP4 , GCN4 , MET4 , NMD4
Rtg1	YJR051W	RTG1 , NRG1 , XBP1 , YRR1 , YAP1 , OSM1
Rtg1	YJR098C	RTG1 , NRG1 , XBP1 , YRR1 , YAP1 , SFP1 , YJR098C
Rtg1	YGL207W	RTG1 , NRG1 , RSF2 , HAP4 , GCN4 , OAF1 , SPT16
Rtg1	YKL162C	RTG1 , NRG1 , XBP1 , YRR1 , YAP1 , AFT1 , YKL162C
Rtg1	YJL037W	RTG1 , NRG1 , XBP1 , YRR1 , YAP1 , SFP1 , IRC18
Rtg1	YJL038C	RTG1 , NRG1 , XBP1 , YRR1 , YAP1 , LOH1
Rtg1	YDR179C	RTG1 , NRG1 , XBP1 , YRR1 , CSN9
Rtg1	YGL258W	RTG1 , HMS1 , VEL1
Rtg1	YDR298C	RTG1 , NRG1 , ATP5
Rtg1	YGR289C	RTG1 , HMS1 , MAL13 , MAL11
Rtg1	YMR098C	RTG1 , NRG1 , XBP1 , YRR1 , YAP1 , SFP1 , ARR1 , ATP25
Rtg1	YAL029C	RTG1 , NRG1 , RSF2 , HAP4 , MYO4
Rtg1	YKR099W	RTG1 , NRG1 , RSF2 , HAP4 , GCN4 , BAS1
Rtg1	YER058W	RTG1 , NRG1 , PET117
Rtg1	YIL157C	RTG1 , NRG1 , XBP1 , YRR1 , YAP1 , COA1
Rtg1	YHR028C	RTG1 , NRG1 , RSF2 , HAP4 , GCN4 , DAP2
Rtg1	YKL071W	RTG1 , PDR3 , YKL071W
Rtg1	YLR353W	RTG1 , NRG1 , XBP1 , YRR1 , YAP1 , AFT1 , BUD8
Rtg1	YGR098C	RTG1 , NRG1 , XBP1 , YRR1 , YAP1 , AFT1 , CAD1 , ESP1
Rtg1	YJR099W	RTG1 , NRG1 , XBP1 , YRR1 , YAP1 , RSC30 , YUH1
Rtg1	YPL015C	RTG1 , NRG1 , RSF2 , HAP4 , GCN4 , HST2
Rtg1	YDL074C	RTG1 , NRG1 , XBP1 , YRR1 , YAP1 , MSN4 , BRE1
Rtg1	YMR090W	RTG1 , PDR3 , YMR090W
Rtg1	YHR176W	RTG1 , HMS1 , FMO1
Rtg1	YGL133W	RTG1 , NRG1 , XBP1 , YRR1 , YAP1 , ITC1
Rtg1	YNL325C	RTG1 , NRG1 , XBP1 , YRR1 , YAP1 , MSN4 , FIG4
Rtg1	YLR364W	RTG1 , NRG1 , RSF2 , HAP4 , GCN4 , MET4 , GRX8
Rtg1	YER143W	RTG1 , NRG1 , XBP1 , YRR1 , YAP1 , DDI1
Rtg1	YKL085W	RTG1 , NRG1 , RSF2 , HAP4 , MDH1
Rtg1	YMR126C	RTG1 , NRG1 , XBP1 , YRR1 , YAP1 , SFP1 , DLT1
Rme1	YMR054W	RME1 , MIG3 , MIG1 , GAL4 , ZAP1 , STV1
Rme1	YMR165C	RME1 , MIG3 , MIG1 , ADR1 , PAH1
Rme1	YFR017C	RME1 , SPT2 , MSN4 , YFR017C
Rme1	YMR014W	RME1 , SPT2 , MSN4 , MSN2 , BUD22
Rme1	YDL184C	RME1 , SPT2 , MSN4 , RPN4 , YAP1 , RPL41A
Rme1	YER189W	RME1 , SPT2 , MSN4 , RPN4 , YAP1 , YER189W
Rme1	YJL191W	RME1 , SPT2 , MSN4 , RPN4 , YAP1 , RPS14B
Rme1	YMR261C	RME1 , SPT2 , MSN4 , TPS3
Rme1	YPL090C	RME1 , SPT2 , MSN4 , RPN4 , RPS6A
Rme1	YGR030C	RME1 , SPT2 , MSN4 , MSN2 , POP6
Rme1	YGR256W	RME1 , NRG1 , RSF2 , PHO4 , GND2
Rme1	YLR065C	RME1 , MIG3 , MIG1 , ADR1 , TEC1 , SFP1 , YLR065C
Rme1	YML125C	RME1 , SPT2 , MSN4 , RPN4 , PGA3
Rme1	YPL130W	RME1 , SPO19
Rme1	YGL135W	RME1 , SPT2 , MSN4 , RPN4 , RPL1B
Rme1	YLR029C	RME1 , SPT2 , MSN4 , RPN4 , RPL15A
Rme1	YJL148W	RME1 , SPT2 , MSN4 , MSN2 , RPA34
Rme1	YGR109C	RME1 , SPT2 , MSN4 , MSN2 , STP2 , CLB6
Rme1	YKL118W	RME1 , SPT2 , MSN4 , RPN4 , YAP1 , YKL118W
Rme1	YLR066W	RME1 , SPT2 , MSN4 , RPN4 , SPC3
Rme1	YGR031W	RME1 , MIG3 , MIG1 , ADR1 , TEC1 , SFP1 , ARR1 , YGR031W
Rme1	YDL130W	RME1 , SPT2 , MSN4 , RPN4 , RPP1B
Rme1	YML100W	RME1 , SPT2 , MSN4 , TSL1
Rme1	YGR060W	RME1 , SPT2 , MSN4 , RPN4 , ERG25
Rme1	YGL190C	RME1 , SPT2 , MSN4 , MSN2 , CDC55
Rme1	YOR042W	RME1 , MIG3 , MIG1 , ADR1 , TEC1 , SFP1 , CUE5
Rme1	YEL012W	RME1 , SPT2 , MSN4 , STE12 , UBC8
Rme1	YPL198W	RME1 , SPT2 , MSN4 , RPN4 , RPL7B
Rme1	YIL169C	RME1 , SPT2 , MSN4 , YIL169C
Rme1	YLR074C	RME1 , SPT2 , MSN4 , MSN2 , BUD20
Rme1	YNL034W	RME1 , YNL034W
Rme1	YIL050W	RME1 , SPT2 , MSN4 , RPN4 , PCL7
Rme1	YML056C	RME1 , MIG3 , MIG1 , ADR1 , IMD4
Rme1	YBL025W	RME1 , MIG3 , MIG1 , ADR1 , TEC1 , SFP1 , RRN10
Rme1	YNR018W	RME1 , SPT2 , MSN4 , RPN4 , YAP1 , YNR018W
Rme1	YMR053C	RME1 , NRG1 , RSF2 , HAP4 , GCN4 , MET4 , STB2
Rme1	YNL032W	RME1 , SPT2 , MSN4 , MSN2 , SIW14
Rme1	YIL158W	RME1 , SPT2 , MSN4 , MSN2 , AZF1 , YIL158W
Rme1	YJL190C	RME1 , SPT2 , MSN4 , RPN4 , RPS22A
Rme1	YMR262W	RME1 , SPT2 , MSN4 , RPN4 , YAP1 , AFT1 , YMR262W
Rme1	YLR075W	RME1 , SPT2 , MSN4 , RPN4 , RPL10
Rme1	YGR109W-B	RME1 , SPT2 , MSN4 , RPN4 , YGR109W-B
Rme1	YGR109W-A	RME1 , SPT2 , MSN4 , RPN4 , YGR109W-A
Rme1	YOL154W	RME1 , NRG1 , ZPS1
Rme1	YKR062W	RME1 , SPT2 , MSN4 , TFA2
Rme1	YMR144W	RME1 , SPT2 , MSN4 , MSN2 , AZF1 , YMR144W
Rme1	YHL034C	RME1 , SPT2 , MSN4 , SBP1
Rme1	YLR367W	RME1 , SPT2 , MSN4 , RPS22B
Rme1	YJL189W	RME1 , SPT2 , MSN4 , HAC1 , RPL39
Rme1	YIL052C	RME1 , SPT2 , MSN4 , RPN4 , RPL34B
Rme1	YBL002W	RME1 , NRG1 , RSF2 , HAP4 , GCN4 , HTB2
Rme1	YLR061W	RME1 , SPT2 , MSN4 , RPN4 , RPL22A
Rme1	YIL051C	RME1 , NRG1 , XBP1 , MMF1
Rme1	YPR161C	RME1 , MIG3 , MIG1 , ADR1 , TEC1 , SFP1 , ARR1 , SGV1
Rme1	YGL236C	RME1 , NRG1 , RSF2 , HAP4 , GCN4 , MET4 , MTO1
Rme1	YLR027C	RME1 , NRG1 , RSF2 , HAP4 , GCN4 , AAT2
Rme1	YOR369C	RME1 , SPT2 , MSN4 , RPS12
Rme1	YDR042C	RME1 , MIG3 , MIG1 , ADR1 , TEC1 , SFP1 , YDR042C
Rme1	YAL004W	RME1 , SPT2 , MSN4 , RPN4 , YAP1 , AFT1 , YAL004W
Rme1	YGL136C	RME1 , SPT2 , MSN4 , RPN4 , YAP1 , AFT1 , MRM2
Rme1	YLR439W	RME1 , SPT2 , MSN4 , MRPL4
Rme1	YPL143W	RME1 , SPT2 , MSN4 , RPN4 , RPL33A
Rme1	YNR044W	RME1 , AGA1
Rme1	YHR143W	RME1 , NRG1 , RSF2 , PHO4 , DSE2
Rme1	YBL003C	RME1 , SPT2 , MSN4 , RPN4 , HTA2
Rme1	YKL132C	RME1 , MIG3 , MIG1 , ADR1 , TEC1 , SFP1 , RMA1
Rme1	YLR369W	RME1 , NRG1 , RSF2 , HAP4 , GCN4 , MET4 , SSQ1
Rme1	YER079W	RME1 , SPT2 , MSN4 , YER079W
Rme1	YML101C	RME1 , MIG3 , MIG1 , ADR1 , TEC1 , SFP1 , CUE4
Rme1	YML131W	RME1 , MIG3 , MIG1 , YML131W
Rme1	YBR217W	RME1 , MIG3 , MIG1 , ADR1 , TEC1 , SFP1 , ATG12
Rme1	YFL034W	RME1 , SPT2 , MSN4 , RPN4 , YAP1 , YFL034W
Rme1	YNL251C	RME1 , SPT2 , MSN4 , NRD1
Rme1	YLL063C	RME1 , SPT2 , MSN4 , RPN4 , YAP1 , AYT1
Rme1	YMR052C-A	RME1 , NRG1 , RSF2 , HAP4 , GCN4 , MET4 , YMR052C-A
Rme1	YLR030W	RME1 , SPT2 , MSN4 , MSN2 , YLR030W
Rme1	YER078C	RME1 , SPT2 , MSN4 , RPN4 , YAP1 , RAP1 , YER078C
Rme1	YJL045W	RME1 , YJL045W
Rme1	YGL234W	RME1 , SPT2 , MSN4 , MSN2 , ADE5
Rme1	YLR368W	RME1 , MIG3 , MIG1 , ADR1 , TEC1 , SFP1 , ARR1 , MDM30
Rme1	YOR236W	RME1 , NRG1 , XBP1 , DFR1
Rme1	YER177W	RME1 , NRG1 , XBP1 , YRR1 , BMH1
Rme1	YML055W	RME1 , SPT2 , MSN4 , MSN2 , SPC2
Rme1	YPL141C	RME1 , SPT2 , MSN4 , RPN4 , YAP1 , AFT1 , FKH1 , YPL141C
Rme1	YKL042W	RME1 , NRG1 , RSF2 , HAP4 , NDT80 , SPC42
Nrg1	YER033C	NRG1 , XBP1 , YRR1 , YAP1 , ZRG8
Nrg1	YOR029W	NRG1 , XBP1 , YRR1 , YAP1 , SFP1 , ARR1 , YOR029W
Nrg1	YDR041W	NRG1 , RSM10
Nrg1	YFR017C	NRG1 , XBP1 , YRR1 , YAP1 , YFR017C
Nrg1	YOR315W	NRG1 , SFG1
Nrg1	YKL044W	NRG1 , XBP1 , YRR1 , YAP1 , YKL044W
Nrg1	YAL064W	NRG1 , RSF2 , HAP4 , GCN4 , MET4 , YAL064W
Nrg1	YOL028C	NRG1 , RSF2 , HAP4 , GCN4 , MET4 , YAP7
Nrg1	YHR156C	NRG1 , RSF2 , PHO4 , LIN1
Nrg1	YOR274W	NRG1 , XBP1 , YRR1 , YAP1 , HAC1 , MOD5
Nrg1	YHR193C	NRG1 , RSF2 , HAP4 , GCN4 , MET4 , EGD2
Nrg1	YNL334C	NRG1 , XBP1 , YRR1 , YAP1 , AFT1 , SNO2
Nrg1	YBR099C	NRG1 , XBP1 , YRR1 , YAP1 , YBR099C
Nrg1	YLR012C	NRG1 , RSF2 , HAP4 , YOX1 , YLR012C
Nrg1	YDL037C	NRG1 , XBP1 , YRR1 , YAP1 , AFT1 , BSC1
Nrg1	YBR157C	NRG1 , XBP1 , MIG3 , MIG1 , ICS2
Nrg1	YKR102W	NRG1 , XBP1 , YRR1 , RPN4 , FLO10
Nrg1	YHR157W	NRG1 , XBP1 , YRR1 , YAP1 , HAC1 , REC104
Nrg1	YIL171W	NRG1 , XBP1 , YRR1 , YAP1 , YIL171W
Nrg1	YOR028C	NRG1 , RSF2 , HAP4 , YOX1 , CIN5
Nrg1	YIL040W	NRG1 , XBP1 , YRR1 , YAP1 , MSN4 , APQ12
Nrg1	YDR259C	NRG1 , RSF2 , HAP4 , GCN4 , PIP2 , YAP6
Nrg1	YDR535C	NRG1 , RSF2 , HAP4 , GCN4 , STB5 , YDR535C
Nrg1	YER001W	NRG1 , XBP1 , YRR1 , RPN4 , MNN1
Nrg1	YBR040W	NRG1 , RSF2 , HAP4 , FIG1
Nrg1	YIR013C	NRG1 , RSF2 , HAP4 , GCN4 , GLN3 , TEC1 , GAT4
Nrg1	YJR103W	NRG1 , XBP1 , YRR1 , YAP1 , URA8
Nrg1	YHR049W	NRG1 , RSF2 , HAP4 , FSH1
Nrg1	YJL219W	NRG1 , XBP1 , YRR1 , YAP1 , HXT9
Nrg1	YPR009W	NRG1 , RSF2 , HAP4 , GCN4 , RFX1 , SUT2
Nrg1	YPL230W	NRG1 , USV1
Nrg1	YLR261C	NRG1 , XBP1 , YRR1 , YAP1 , SFP1 , VPS63
Nrg1	YJL221C	NRG1 , RSF2 , HAP4 , FSP2
Nrg1	YFL059W	NRG1 , RSF2 , HAP4 , SNZ3
Nrg1	YJR158W	NRG1 , RSF2 , HAP4 , HXT16
Nrg1	YDR343C	NRG1 , HXT6
Nrg1	YER045C	NRG1 , XBP1 , YRR1 , YAP1 , ACA1
Nrg1	YGL227W	NRG1 , XBP1 , YRR1 , RPN4 , VID30
Nrg1	YPL018W	NRG1 , RSF2 , PHO4 , CTF19
Nrg1	YOL156W	NRG1 , XBP1 , YRR1 , YAP1 , HXT11
Nrg1	YEL040W	NRG1 , RSF2 , HAP4 , UTR2
Nrg1	YIL119C	NRG1 , RPI1
Nrg1	YER019W	NRG1 , XBP1 , YRR1 , ISC1
Nrg1	YJR094C	NRG1 , RSF2 , HAP4 , IME1
Nrg1	YNL111C	NRG1 , XBP1 , YRR1 , RPN4 , UPC2 , CYB5
Nrg1	YIL099W	NRG1 , SGA1
Nrg1	YIL019W	NRG1 , XBP1 , YRR1 , YAP1 , FAF1
Nrg1	YPR013C	NRG1 , XBP1 , YRR1 , YAP1 , YPR013C
Nrg1	YDR434W	NRG1 , XBP1 , YRR1 , YAP1 , SFP1 , GPI17
Nrg1	YOR273C	NRG1 , XBP1 , YRR1 , YAP1 , TPO4
Nrg1	YOR032C	NRG1 , RSF2 , HAP4 , YOX1 , HMS1
Nrg1	YPL021W	NRG1 , XBP1 , YRR1 , YAP1 , ECM23
Nrg1	YDR536W	NRG1 , XBP1 , STL1
Nrg1	YER044C	NRG1 , XBP1 , YRR1 , YAP1 , ERG28
Nrg1	YMR319C	NRG1 , XBP1 , YRR1 , YAP1 , FET4
Nrg1	YDR052C	NRG1 , RSF2 , HAP4 , GCN4 , MET4 , DBF4
Nrg1	YIL020C	NRG1 , XBP1 , YRR1 , YAP1 , SFP1 , HIS6
Nrg1	YGR249W	NRG1 , XBP1 , YRR1 , YAP1 , MGA1
Nrg1	YOR010C	NRG1 , XBP1 , YRR1 , RPN4 , TIR2
Nrg1	YNR050C	NRG1 , RSF2 , HAP4 , GCN4 , LYS9
Nrg1	YDR134C	NRG1 , XBP1 , YRR1 , RPN4 , YDR134C
Nrg1	YFL060C	NRG1 , RSF2 , HAP4 , GCN4 , SNO3
Nrg1	YIL097W	NRG1 , XBP1 , YRR1 , YAP1 , MSN4 , FYV10
Nrg1	YDR040C	NRG1 , ENA1
Nrg1	YPL034W	NRG1 , XBP1 , YRR1 , RPN4 , YPL034W
Nrg1	YMR135C	NRG1 , RSF2 , HAP4 , GCN4 , LEU3 , GID8
Nrg1	YLR023C	NRG1 , XBP1 , YRR1 , YAP1 , IFH1 , IZH3
Nrg1	YLR013W	NRG1 , XBP1 , YRR1 , RPN4 , GAT3
Nrg1	YIR020C	NRG1 , XBP1 , YRR1 , YAP1 , AFT1 , CAD1 , YIR020C
Nrg1	YIL118W	NRG1 , RSF2 , HAP4 , GCN4 , LEU3 , RHO3
Nrg1	YEL069C	NRG1 , RSF2 , HAP4 , MIG2 , HXT13
Nrg1	YNL333W	NRG1 , RSF2 , HAP4 , SNZ2
Nrg1	YLR112W	NRG1 , RSF2 , HAP4 , GCN4 , MET4 , YLR112W
Nrg1	YPL251W	NRG1 , XBP1 , YRR1 , RPN4 , YPL251W
Nrg1	YIL172C	NRG1 , XBP1 , YRR1 , PDR3 , YIL172C
Nrg1	YJL216C	NRG1 , XBP1 , YRR1 , YJL216C
Nrg1	YHR033W	NRG1 , YHR033W
Nrg1	YJL105W	NRG1 , RSF2 , HAP4 , YOX1 , SET4
Nrg1	YKL177W	NRG1 , XBP1 , YRR1 , YAP1 , RAP1 , YKL177W
Nrg1	YDL245C	NRG1 , XBP1 , YRR1 , RPN4 , HXT15
Nrg1	YHR138C	NRG1 , XBP1 , YHR138C
Nrg1	YMR017W	NRG1 , RSF2 , HAP4 , GCN4 , SPO20
Nrg1	YEL007W	NRG1 , RSF2 , HAP4 , GCN4 , LEU3 , YEL007W
Nrg1	YDR441C	NRG1 , RSF2 , HAP4 , GCN4 , APT2
Nrg1	YOR049C	NRG1 , RSB1
Nrg1	YLR286C	NRG1 , XBP1 , YRR1 , YAP1 , CTS1
Nrg1	YEL070W	NRG1 , RSF2 , HAP4 , MIG2 , DSF1
Nrg1	YLR413W	NRG1 , XBP1 , YRR1 , YAP1 , YLR413W
Nrg1	YBL043W	NRG1 , RSF2 , HAP4 , ECM13
Nrg1	YAL017W	NRG1 , XBP1 , YRR1 , YAP1 , PSK1
Nrg1	YMR135W-A	NRG1 , XBP1 , YRR1 , YAP1 , STP1 , YMR135W-A
Nrg1	YDL246C	NRG1 , RSF2 , HAP4 , YOX1 , SOR2
Nrg1	YPL019C	NRG1 , RSF2 , PHO4 , VTC3
Nrg1	YHR012W	NRG1 , XBP1 , YRR1 , YAP1 , SFP1 , VPS29
Nrg1	YER011W	NRG1 , XBP1 , YRR1 , RPN4 , TIR1
Nrg1	YER034W	NRG1 , XBP1 , YRR1 , YAP1 , SFP1 , YER034W
Nrg1	YDR042C	NRG1 , XBP1 , YRR1 , YAP1 , SFP1 , YDR042C
Nrg1	YIL098C	NRG1 , FMC1
Nrg1	YDL122W	NRG1 , RSF2 , HAP4 , GCN4 , UBP1
Nrg1	YNR060W	NRG1 , FRE4
Nrg1	YER018C	NRG1 , RSF2 , HAP4 , GCN4 , SPC25
Nrg1	YDR077W	NRG1 , XBP1 , YRR1 , RPN4 , SED1
Nrg1	YGL158W	NRG1 , XBP1 , YRR1 , YAP1 , RCK1
Nrg1	YIL170W	NRG1 , XBP1 , YRR1 , YAP1 , HXT12
Nrg1	YMR056C	NRG1 , XBP1 , YRR1 , YAP1 , SFP1 , ARR1 , AAC1
Nrg1	YGR050C	NRG1 , YGR050C
Nrg1	YDR133C	NRG1 , XBP1 , YRR1 , RPN4 , YDR133C
Nrg1	YLR221C	NRG1 , RSF2 , HAP4 , GCN4 , RSA3
Nrg1	YHR195W	NRG1 , RSF2 , PHO4 , NVJ1
Nrg1	YAL022C	NRG1 , RSF2 , HAP4 , YOX1 , FUN26
Nrg1	YJR159W	NRG1 , RSF2 , HAP4 , SOR1
Nrg1	YIR014W	NRG1 , XBP1 , YRR1 , YAP1 , YIR014W
Nrg1	YPL253C	NRG1 , XBP1 , YRR1 , RPN4 , VIK1
Nrg1	YJR102C	NRG1 , RSF2 , HAP4 , GCN4 , STP2 , VPS25
Nrg1	YOL157C	NRG1 , XBP1 , YRR1 , YOL157C
Nrg1	YGR218W	NRG1 , XBP1 , YRR1 , YAP1 , RLM1 , CRM1
Nrg1	YMR136W	NRG1 , XBP1 , YRR1 , RPN4 , GAT2
Nrg1	YBL029W	NRG1 , RSF2 , HAP4 , GCN4 , MET4 , YBL029W
Nrg1	YNR070W	NRG1 , XBP1 , YRR1 , PDR3 , YNR070W
Nrg1	YAL018C	NRG1 , XBP1 , YRR1 , YAP1 , RAP1 , YAL018C
Nrg1	YIL122W	NRG1 , RSF2 , HAP4 , GCN4 , POG1
Rtg3	YGR072W	RTG3 , NRG1 , RSF2 , HAP4 , GCN4 , STP2 , UPF3
Rtg3	YKR103W	RTG3 , NRG1 , XBP1 , YRR1 , YAP1 , AFT2 , NFT1
Rtg3	YBR167C	RTG3 , NRG1 , XBP1 , YRR1 , RPN4 , POP7
Rtg3	YIL037C	RTG3 , HMS1 , PRM2
Rtg3	YKR089C	RTG3 , NRG1 , XBP1 , YRR1 , RPN4 , TGL4
Rtg3	YKR090W	RTG3 , NRG1 , RSF2 , HAP4 , GCN4 , PXL1
Rtg3	YLR276C	RTG3 , NRG1 , XBP1 , YRR1 , YAP1 , DBP9
Rtg3	YER115C	RTG3 , NRG1 , XBP1 , MIG3 , MIG1 , ADR1 , SPR6
Rtg3	YDR131C	RTG3 , NRG1 , XBP1 , YRR1 , YAP1 , YDR131C
Rtg3	YDR179C	RTG3 , NRG1 , XBP1 , YRR1 , CSN9
Rtg3	YER002W	RTG3 , NRG1 , XBP1 , YRR1 , YAP1 , NOP16
Rtg3	YDR473C	RTG3 , NRG1 , XBP1 , YRR1 , YAP1 , PRP3
Rtg3	YGL178W	RTG3 , NRG1 , XBP1 , YRR1 , YAP1 , MPT5
Rtg3	YNL009W	RTG3 , NRG1 , RSF2 , HAP4 , IDP3
Rtg3	YKL177W	RTG3 , NRG1 , XBP1 , YRR1 , YAP1 , RAP1 , YKL177W
Rtg3	YBR168W	RTG3 , NRG1 , RSF2 , HAP4 , GCN4 , STE12 , PEX32
Rtg3	YMR193W	RTG3 , NRG1 , XBP1 , YRR1 , YAP1 , SFP1 , ARR1 , MRPL24
Rtg3	YDR434W	RTG3 , NRG1 , XBP1 , YRR1 , YAP1 , SFP1 , GPI17
Rtg3	YDL247W	RTG3 , NRG1 , XBP1 , YRR1 , YAP1 , AFT1 , MPH2
Rtg3	YCR096C	RTG3 , NRG1 , XBP1 , YRR1 , YAP1 , HAC1 , HMRA2
Rtg3	YER138C	RTG3 , NRG1 , XBP1 , YRR1 , YAP1 , YER138C
Rtg3	YFR023W	RTG3 , NRG1 , XBP1 , YRR1 , YAP1 , SFP1 , PES4
Rtg3	YMR049C	RTG3 , NRG1 , XBP1 , YRR1 , YAP1 , ERB1
Rtg3	YDL044C	RTG3 , NRG1 , XBP1 , MIG3 , MIG1 , MTF2
Rtg3	YDR522C	RTG3 , HMS1 , SPS2
Rtg3	YDL017W	RTG3 , NRG1 , XBP1 , YRR1 , YAP1 , CDC7
Rtg3	YLR318W	RTG3 , NRG1 , XBP1 , YRR1 , YAP1 , SFP1 , EST2
Rtg3	YGR273C	RTG3 , NRG1 , RSF2 , HAP4 , GCN4 , SUM1 , YGR273C
Rtg3	YKR061W	RTG3 , NRG1 , RSF2 , HAP4 , GCN4 , MET4 , KTR2
Rtg3	YCR019W	RTG3 , NRG1 , XBP1 , YRR1 , RPN4 , MAK32
Rtg3	YJL203W	RTG3 , NRG1 , XBP1 , YRR1 , YAP1 , SFP1 , PRP21
Rtg3	YIR005W	RTG3 , NRG1 , RSF2 , HAP4 , GCN4 , IST3
Rtg3	YPL124W	RTG3 , HMS1 , SPC29
Rtg3	YMR098C	RTG3 , NRG1 , XBP1 , YRR1 , YAP1 , SFP1 , ARR1 , ATP25
Rtg3	YAL029C	RTG3 , NRG1 , RSF2 , HAP4 , MYO4
Rtg3	YLR363C	RTG3 , NRG1 , RSF2 , HAP4 , GCN4 , MET4 , NMD4
Rtg3	YKR009C	RTG3 , NRG1 , XBP1 , FOX2
Rtg3	YOR058C	RTG3 , NRG1 , XBP1 , YRR1 , YAP1 , ASE1
Rtg3	YLR125W	RTG3 , NRG1 , XBP1 , YRR1 , YAP1 , SFP1 , HSF1 , YLR125W
Rtg3	YJR108W	RTG3 , NRG1 , RSF2 , HAP4 , GCN4 , ABM1
Rtg3	YGL001C	RTG3 , NRG1 , RSF2 , HAP4 , GCN4 , ERG26
Rtg3	YKL071W	RTG3 , NRG1 , XBP1 , YRR1 , YAP1 , YKL071W
Rtg3	YDL018C	RTG3 , NRG1 , RSF2 , HAP4 , YOX1 , SWI4 , ERP3
Rtg3	YDR042C	RTG3 , NRG1 , XBP1 , YRR1 , YAP1 , SFP1 , YDR042C
Rtg3	YHR043C	RTG3 , NRG1 , DOG2
Rtg3	YPL209C	RTG3 , NRG1 , RSF2 , HAP4 , GCN4 , IPL1
Rtg3	YDR179W-A	RTG3 , NRG1 , RSF2 , HAP4 , GCN4 , YDR179W-A
Rtg3	YOL144W	RTG3 , NRG1 , XBP1 , YRR1 , PDR3 , NOP8
Rtg3	YMR258C	RTG3 , NRG1 , XBP1 , YRR1 , RPN4 , YMR258C
Rtg3	YLR364W	RTG3 , NRG1 , RSF2 , HAP4 , GCN4 , MET4 , GRX8
Rtg3	YLR316C	RTG3 , NRG1 , RSF2 , HAP4 , GCN4 , TAD3
Rtg3	YPL208W	RTG3 , NRG1 , XBP1 , YRR1 , YAP1 , RKM1
Rtg3	YAL028W	RTG3 , NRG1 , XBP1 , YRR1 , YAP1 , SFP1 , FRT2
Rtg3	YFL011W	RTG3 , NRG1 , RSF2 , HAP4 , YOX1 , HXT10
Aft1	YFR001W	AFT1 , CAD1 , LOC1
Aft1	YLR136C	AFT1 , TIS11
Aft1	YKR026C	AFT1 , HAP4 , GCN4 , GCN3
Aft1	YGL098W	AFT1 , TEC1 , SFP1 , USE1
Aft1	YGR024C	AFT1 , HAP4 , GCN4 , THG1
Aft1	YHR171W	AFT1 , RPN4 , MGA1 , ATG7
Aft1	YKR010C	AFT1 , HAP4 , GCN4 , TOF2
Aft1	YHL012W	AFT1 , NRG1 , RSF2 , PHO4 , YHL012W
Aft1	YDR152W	AFT1 , HAP4 , GCN4 , GIR2
Aft1	YGR187C	AFT1 , CAD1 , MET4 , HGH1
Aft1	YKR083C	AFT1 , NRG1 , DAD2
Aft1	YDR064W	AFT1 , RPN4 , RPS13
Aft1	YGR218W	AFT1 , RPN4 , YAP1 , RLM1 , CRM1
Aft1	YPR137W	AFT1 , RRP9
Aft1	YDR523C	AFT1 , NDT80 , SPS1
Aft1	YGL071W	AFT1
Aft1	YER019W	AFT1 , CAD1 , MET4 , ISC1
Aft1	YPR179C	AFT1 , TEC1 , SFP1 , HDA3
Aft1	YHL039W	AFT1 , HAP4 , YHL039W
Aft1	YDR372C	AFT1 , RPN4 , YAP1 , IFH1 , VPS74
Aft1	YLR166C	AFT1 , TEC1 , SFP1 , SEC10
Aft1	YPL251W	AFT1 , RPN4 , YPL251W
Aft1	YLR137W	AFT1 , ZAP1 , YLR137W
Aft1	YLL051C	AFT1 , FRE6
Aft1	YPL253C	AFT1 , RPN4 , VIK1
Aft1	YDR323C	AFT1 , TEC1 , SFP1 , PEP7
Aft1	YDR322C-A	AFT1 , HAP4 , TIM11
Aft1	YLR002C	AFT1 , TEC1 , SFP1 , NOC3
Aft1	YEL001C	AFT1 , TEC1 , SFP1 , IRC22
Aft1	YJL094C	AFT1 , HAP4 , GCN4 , KHA1
Aft1	YLR061W	AFT1 , RPN4 , RPL22A
Aft1	YHL013C	AFT1 , CAD1 , MET4 , OTU2
Aft1	YMR320W	AFT1 , YMR320W
Aft1	YHL040C	AFT1 , ARN1
Aft1	YMR319C	AFT1 , FET4
Aft1	YPL018W	AFT1 , TEC1 , SFP1 , ADR1 , CTF19
Aft1	YAL017W	AFT1 , RPN4 , PSK1
Aft1	YHR138C	AFT1 , YHR138C
Aft1	YMR098C	AFT1 , TEC1 , SFP1 , ARR1 , ATP25
Aft1	YOR258W	AFT1 , RPN4 , YRR1 , HNT3
Aft1	YMR200W	AFT1 , TEC1 , SFP1 , ROT1
Aft1	YLR277C	AFT1 , YSH1
Aft1	YOL105C	AFT1 , HAP4 , GCN4 , LEU3 , WSC3
Aft1	YMR056C	AFT1 , TEC1 , SFP1 , ARR1 , AAC1
Aft1	YBR040W	AFT1 , HAP4 , FIG1
Aft1	YGL230C	AFT1 , TEC1 , SFP1 , HSF1 , YGL230C
Aft1	YPL034W	AFT1 , RPN4 , YPL034W
Aft1	YNL230C	AFT1 , RPN4 , PDR1 , ELA1
Aft1	YOL144W	AFT1 , GCR1 , PDR3 , NOP8
Aft1	YNL241C	AFT1 , CAD1 , MET4 , ZWF1
Aft1	YAL018C	AFT1 , RPN4 , YAP1 , RAP1 , YAL018C
Aft1	YPL019C	AFT1 , VTC3
Aft1	YLR167W	AFT1 , GCR1 , RPS31
Aft1	YDR373W	AFT1 , TEC1 , SFP1 , FRQ1
Aft1	YER018C	AFT1 , RPN4 , KAR4 , SPC25
Aft1	YDR541C	AFT1 , TEC1 , SUT1 , YDR541C
Fhl1	YDR384C	FHL1 , FKH1 , ACE2 , RME1 , SPT2 , MSN4 , HAC1 , ATO3
Fhl1	YGL123W	FHL1 , FKH1 , ACE2 , RME1 , SPT2 , MSN4 , RPN4 , YAP1 , RPS2
Fhl1	YDR025W	FHL1 , FKH1 , ACE2 , RME1 , SPT2 , MSN4 , MSN2 , RPS11A
Fhl1	YLR333C	FHL1 , RPS25B
Fhl1	YBR116C	FHL1 , FKH1 , ACE2 , RME1 , MIG3 , MIG1 , ADR1 , YBR116C
Fhl1	YKR057W	FHL1 , FKH1 , ACE2 , RME1 , SPT2 , MSN4 , RPN4 , RPS21A
Fhl1	YGR148C	FHL1 , RPL24B
Fhl1	YER131W	FHL1 , RPS26B
Fhl1	YDL184C	FHL1 , FKH1 , ACE2 , RME1 , SPT2 , MSN4 , RPN4 , YAP1 , RPL41A
Fhl1	YAL022C	FHL1 , FKH1 , ACE2 , RME1 , NRG1 , RSF2 , HAP4 , YOX1 , FUN26
Fhl1	YLR388W	FHL1 , FKH1 , ACE2 , RME1 , SPT2 , MSN4 , MSN2 , RPS29A
Fhl1	YHL015W	FHL1 , FKH1 , ACE2 , RME1 , SPT2 , MSN4 , RPN4 , RPS20
Fhl1	YPL220W	FHL1 , FKH1 , ACE2 , RME1 , SPT2 , MSN4 , RPN4 , RPL1A
Fhl1	YKL006W	FHL1 , RPL14A
Fhl1	YPR102C	FHL1 , RPL11A
Fhl1	YLR048W	FHL1 , RPS0B
Fhl1	YIL149C	FHL1 , MLP2
Fhl1	YJL191W	FHL1 , RPS14B
Fhl1	YLR340W	FHL1 , RPP0
Fhl1	YJL178C	FHL1 , ATG27
Fhl1	YPL090C	FHL1 , RPS6A
Fhl1	YMR229C	FHL1 , FKH1 , ACE2 , RME1 , RRP5
Fhl1	YNL302C	FHL1 , RPS19B
Fhl1	YPL080C	FHL1 , FKH1 , ACE2 , RME1 , SPT2 , MSN4 , RPN4 , YAP1 , YPL080C
Fhl1	YER101C	FHL1 , AST2
Fhl1	YKL006C-A	FHL1 , FKH1 , ACE2 , RME1 , NRG1 , RSF2 , HAP4 , GCN4 , MET4 , SFT1
Fhl1	YER130C	FHL1 , YER130C
Fhl1	YOR355W	FHL1 , FKH1 , ACE2 , RME1 , SPT2 , MSN4 , RPN4 , YAP1 , RAP1 , GDS1
Fhl1	YHL033C	FHL1 , FKH1 , ACE2 , RME1 , NRG1 , RPL8A
Fhl1	YDL076C	FHL1 , FKH1 , ACE2 , RME1 , MIG3 , MIG1 , ADR1 , TEC1 , SFP1 , RXT3
Fhl1	YHR021W-A	FHL1 , FKH1 , ACE2 , RME1 , SPT2 , MSN4 , MSN2 , ECM12
Fhl1	YLR149C	FHL1 , FKH1 , ACE2 , RME1 , SPT2 , MSN4 , RPN4 , YLR149C
Fhl1	YJL192C	FHL1 , SOP4
Fhl1	YLL043W	FHL1 , FKH1 , ACE2 , RME1 , SPT2 , MSN4 , FPS1
Fhl1	YIL148W	FHL1 , RPL40A
Fhl1	YDL130W	FHL1 , RPP1B
Fhl1	YOR161C	FHL1 , FKH1 , ACE2 , RME1 , PNS1
Fhl1	YOR096W	FHL1 , RPS7A
Fhl1	YKL180W	FHL1 , RPL17A
Fhl1	YDR450W	FHL1 , RPS18A
Fhl1	YNL163C	FHL1 , RIA1
Fhl1	YOR312C	FHL1 , RPL20B
Fhl1	YBL087C	FHL1 , RPL23A
Fhl1	YGR117C	FHL1 , YGR117C
Fhl1	YIL018W	FHL1 , RPL2B
Fhl1	YDL075W	FHL1 , RPL31A
Fhl1	YBR084C-A	FHL1 , FKH1 , ACE2 , RME1 , SPT2 , MSN4 , RPN4 , RPL19A
Fhl1	YDL061C	FHL1 , RPS29B
Fhl1	YDR449C	FHL1 , UTP6
Fhl1	YLR447C	FHL1 , VMA6
Fhl1	YGL031C	FHL1 , FKH1 , ACE2 , RME1 , SPT2 , MSN4 , RPN4 , RPL24A
Fhl1	YOR292C	FHL1 , YOR292C
Fhl1	YOR183W	FHL1 , FYV12
Fhl1	YGR085C	FHL1 , FKH1 , ACE2 , RME1 , SPT2 , MSN4 , RPN4 , RPL11B
Fhl1	YPR043W	FHL1 , RPL43A
Fhl1	YLR325C	FHL1 , FKH1 , ACE2 , RME1 , SPT2 , MSN4 , RPN4 , RPL38
Fhl1	YEL008W	FHL1 , FKH1 , ACE2 , RME1 , SPT2 , MSN4 , RPN4 , YAP1 , YEL008W
Fhl1	YJR146W	FHL1 , YJR146W
Fhl1	YGL104C	FHL1 , VPS73
Fhl1	YKL156W	FHL1 , RPS27A
Fhl1	YDR447C	FHL1 , FKH1 , ACE2 , RME1 , SPT2 , MSN4 , RPN4 , RPS17B
Fhl1	YHR204W	FHL1 , MNL1
Fhl1	YGR118W	FHL1 , RPS23A
Fhl1	YBR012W-B	FHL1 , FKH1 , ACE2 , RME1 , SPT2 , MSN4 , RPN4 , YAP1 , YBR012W-B
Fhl1	YBR012W-A	FHL1 , FKH1 , ACE2 , RME1 , SPT2 , MSN4 , RPN4 , YAP1 , YBR012W-A
Fhl1	YBR117C	FHL1 , FKH1 , ACE2 , RME1 , SPT2 , MSN4 , TKL2
Fhl1	YGR214W	FHL1 , FKH1 , ACE2 , RME1 , SPT2 , MSN4 , RPN4 , RPS0A
Fhl1	YGL135W	FHL1 , RPL1B
Fhl1	YHR142W	FHL1 , CHS7
Fhl1	YOR234C	FHL1 , RPL33B
Fhl1	YOL120C	FHL1 , RPL18A
Fhl1	YBR190W	FHL1 , YBR190W
Fhl1	YOR293W	FHL1 , RPS10A
Fhl1	YML024W	FHL1 , RPS17A
Fhl1	YMR143W	FHL1 , RPS16A
Fhl1	YDL191W	FHL1 , RPL35A
Fhl1	YDR064W	FHL1 , RPS13
Fhl1	YLR367W	FHL1 , FKH1 , ACE2 , RME1 , SPT2 , MSN4 , RPS22B
Fhl1	YBR085W	FHL1 , AAC3
Fhl1	YGL188C	FHL1 , FKH1 , ACE2 , RME1 , NRG1 , YGL188C
Fhl1	YPL199C	FHL1 , FKH1 , ACE2 , RME1 , SPT2 , MSN4 , RPN4 , YAP1 , YPL199C
Fhl1	YBR184W	FHL1 , FKH1 , ACE2 , RME1 , SPT2 , MSN4 , RPN4 , YAP1 , YBR184W
Fhl1	YHL001W	FHL1 , RPL14B
Fhl1	YLR287C-A	FHL1 , FKH1 , ACE2 , RME1 , SPT2 , MSN4 , HAC1 , RPS30A
Fhl1	YJL136C	FHL1 , RPS21B
Fhl1	YDR385W	FHL1 , FKH1 , ACE2 , RME1 , SPT2 , MSN4 , RPN4 , YAP1 , EFT2
Fhl1	YDR448W	FHL1 , FKH1 , ACE2 , RME1 , SPT2 , MSN4 , ADA2
Fhl1	YJR123W	FHL1 , RPS5
Fhl1	YGR084C	FHL1 , FKH1 , ACE2 , RME1 , NRG1 , RSF2 , MRP13
Fhl1	YJL190C	FHL1 , RPS22A
Fhl1	YHR141C	FHL1 , RPL42B
Fhl1	YFR031C-A	FHL1 , FKH1 , ACE2 , RME1 , SPT2 , MSN4 , RPN4 , RPL2A
Fhl1	YGL147C	FHL1 , RPL9A
Fhl1	YJL189W	FHL1 , RPL39
Fhl1	YBR118W	FHL1 , FKH1 , ACE2 , RME1 , MIG3 , MIG1 , ADR1 , TEC1 , SFP1 , TEF2
Fhl1	YDR024W	FHL1 , FKH1 , ACE2 , RME1 , SPT2 , MSN4 , RPN4 , YAP1 , FYV1
Fhl1	YHL016C	FHL1 , FKH1 , ACE2 , GAT1 , DAL80 , DUR3
Fhl1	YGR027C	FHL1 , FKH1 , ACE2 , RME1 , NRG1 , RSF2 , HAP4 , GCN4 , RPS25A
Fhl1	YMR242C	FHL1 , RPL20A
Fhl1	YDL083C	FHL1 , RPS16B
Fhl1	YDL136W	FHL1 , FKH1 , ACE2 , RME1 , NRG1 , RSF2 , PHO4 , RPL35B
Fhl1	YBR191W	FHL1 , RPL21A
Fhl1	YNL068C	FHL1 , FKH1 , ACE2 , RME1 , NRG1 , RSF2 , HAP4 , YOX1 , SWI4 , HCM1 , FKH2
Fhl1	YPR080W	FHL1 , FKH1 , ACE2 , RME1 , SPT2 , MSN4 , RPN4 , YAP1 , RAP1 , TEF1
Fhl1	YDR418W	FHL1 , RPL12B
Fhl1	YLR029C	FHL1 , RPL15A
Fhl1	YDR471W	FHL1 , RPL27B
Fhl1	YOL040C	FHL1 , RPS15
Fhl1	YJL134W	FHL1 , LCB3
Fhl1	YLR441C	FHL1 , FKH1 , ACE2 , RME1 , SPT2 , MSN4 , RPN4 , RPS1A
Fhl1	YKR094C	FHL1 , FKH1 , ACE2 , RME1 , SPT2 , MSN4 , RPN4 , YAP1 , RPL40B
Fhl1	YIL133C	FHL1 , RPL16A
Fhl1	YOL039W	FHL1 , RPP2A
Fhl1	YGR034W	FHL1 , RPL26B
Fhl1	YLR344W	FHL1 , RPL26A
Fhl1	YOR095C	FHL1 , FKH1 , ACE2 , RME1 , MIG3 , MIG1 , CAT8 , RKI1
Fhl1	YLR075W	FHL1 , RPL10
Fhl1	YLR183C	FHL1 , FKH1 , ACE2 , RME1 , MIG3 , MIG1 , CAT8 , TOS4
Fhl1	YLR166C	FHL1 , SEC10
Fhl1	YNL067W	FHL1 , FKH1 , ACE2 , RME1 , SPT2 , MSN4 , RPL9B
Fhl1	YJR147W	FHL1 , HMS2
Fhl1	YMR116C	FHL1 , FKH1 , ACE2 , RME1 , SPT2 , MSN4 , RPN4 , ASC1
Fhl1	YBR188C	FHL1 , FKH1 , ACE2 , RME1 , SPT2 , MSN4 , RPN4 , YAP1 , NTC20
Fhl1	YPL082C	FHL1 , FKH1 , ACE2 , RME1 , SPT2 , MSN4 , RPN4 , MOT1
Fhl1	YML073C	FHL1 , FKH1 , ACE2 , RME1 , SPT2 , MSN4 , RPN4 , RPL6A
Fhl1	YLR061W	FHL1 , RPL22A
Fhl1	YGL030W	FHL1 , FKH1 , ACE2 , RME1 , SPT2 , MSN4 , RPN4 , RPL30
Fhl1	YDL060W	FHL1 , TSR1
Fhl1	YPR042C	FHL1 , FKH1 , ACE2 , RME1 , NRG1 , XBP1 , YRR1 , PUF2
Fhl1	YER074W	FHL1 , RPS24A
Fhl1	YKR095W	FHL1 , FKH1 , ACE2 , RME1 , SPT2 , MSN4 , RPN4 , YAP1 , RLM1 , MLP1
Fhl1	YDL183C	FHL1 , FKH1 , ACE2 , GAT1 , GZF3 , YDL183C
Fhl1	YJL135W	FHL1 , YJL135W
Fhl1	YIL069C	FHL1 , FKH1 , ACE2 , RME1 , SPT2 , MSN4 , RPN4 , RPS24B
Fhl1	YGR213C	FHL1 , FKH1 , ACE2 , RME1 , RTA1
Fhl1	YEL009C	FHL1 , FKH1 , ACE2 , RME1 , NRG1 , RSF2 , HAP4 , GCN4
Fhl1	YDR470C	FHL1 , UGO1
Fhl1	YOR369C	FHL1 , RPS12
Fhl1	YPL079W	FHL1 , FKH1 , ACE2 , RME1 , SPT2 , MSN4 , RPN4 , RPL21B
Fhl1	YMR142C	FHL1 , RPL13B
Fhl1	YOL127W	FHL1 , RPL25
Fhl1	YGL136C	FHL1 , MRM2
Fhl1	YLR074C	FHL1 , FKH1 , ACE2 , RME1 , SPT2 , MSN4 , MSN2 , BUD20
Fhl1	YLR264W	FHL1 , FKH1 , ACE2 , RME1 , NRG1 , XBP1 , YRR1 , PDR3 , RPS28B
Fhl1	YLR326W	FHL1 , FKH1 , ACE2 , RME1 , MIG3 , MIG1 , ADR1 , TEC1 , SFP1 , YLR326W
Fhl1	YPL143W	FHL1 , RPL33A
Fhl1	YNL069C	FHL1 , FKH1 , ACE2 , RME1 , SPT2 , MSN4 , RPN4 , RPL16B
Fhl1	YDL133W	FHL1 , YDL133W
Fhl1	YLR387C	FHL1 , FKH1 , ACE2 , RME1 , SPT2 , MSN4 , RPN4 , REH1
Fhl1	YML064C	FHL1 , TEM1
Fhl1	YHR021C	FHL1 , RPS27B
Fhl1	YDL082W	FHL1 , RPL13A
Fhl1	YPL131W	FHL1 , FKH1 , ACE2 , RME1 , SPT2 , MSN4 , RPN4 , RPL5
Fhl1	YBL093C	FHL1 , ROX3
Fhl1	YJL177W	FHL1 , RPL17B
Fhl1	YLR185W	FHL1 , RPL37A
Fhl1	YMR230W	FHL1 , FKH1 , ACE2 , RME1 , SPT2 , MSN4 , RPN4 , RPS10B
Fhl1	YMR194W	FHL1 , FKH1 , ACE2 , RME1 , NRG1 , RSF2 , HAP4 , GCN4 , LEU3 , RPL36A
Fhl1	YBR189W	FHL1 , RPS9B
Fhl1	YPL081W	FHL1 , FKH1 , ACE2 , RME1 , SPT2 , MSN4 , RPN4 , YAP1 , RPS9A
Fhl1	YER102W	FHL1 , RPS8B
Fhl1	YNL096C	FHL1 , RPS7B
Fhl1	YER117W	FHL1 , RPL23B
Fhl1	YOR354C	FHL1 , FKH1 , ACE2 , RME1 , MIG3 , MIG1 , CAT8 , MSC6
Fhl1	YPR131C	FHL1 , NAT3
Fhl1	YNL162W	FHL1 , RPL42A
Fhl1	YLR406C	FHL1 , RPL31B
Fhl1	YFL034W	FHL1 , FKH1 , ACE2 , RME1 , SPT2 , MSN4 , RPN4 , YAP1 , YFL034W
Fhl1	YJR145C	FHL1 , RPS4A
Fhl1	YML026C	FHL1 , RPS18B
Fhl1	YGL189C	FHL1 , RPS26A
Fhl1	YPR103W	FHL1 , PRE2
Fhl1	YHR203C	FHL1 , RPS4B
Fhl1	YLR030W	FHL1 , YLR030W
Fhl1	YGR149W	FHL1 , YGR149W
Fhl1	YNL178W	FHL1 , FKH1 , ACE2 , RME1 , SPT2 , MSN4 , RPN4 , RPS3
Fhl1	YEL054C	FHL1 , RPL12A
Fhl1	YGL103W	FHL1 , RPL28
Fhl1	YER116C	FHL1 , SLX8
Fhl1	YER056C-A	FHL1 , FKH1 , ACE2 , RME1 , NRG1 , RSF2 , HAP4 , GCN4 , RPL34A
Fhl1	YBL092W	FHL1 , RPL32
Fhl1	YML063W	FHL1 , RPS1B
Fhl1	YLR452C	FHL1 , FKH1 , ACE2 , RME1 , SPT2 , MSN4 , RPN4 , SST2
Fhl1	YOR236W	FHL1 , FKH1 , ACE2 , RME1 , NRG1 , XBP1 , DFR1
Fhl1	YPR132W	FHL1 , RPS23B
Fhl1	YOL121C	FHL1 , FKH1 , ACE2 , RME1 , SPT2 , MSN4 , RPN4 , RPS19A
Fhl1	YBL072C	FHL1 , FKH1 , ACE2 , RME1 , SPT2 , MSN4 , RPN4 , RPS8A
Fhl1	YOR182C	FHL1 , FKH1 , ACE2 , RME1 , SPT2 , RPS30B
Fhl1	YDR500C	FHL1 , FKH1 , ACE2 , RME1 , SPT2 , MSN4 , RPN4 , YAP1 , RPL37B
Fhl1	YLR150W	FHL1 , FKH1 , ACE2 , RME1 , SPT2 , MSN4 , RPN4 , STM1
Fhl1	YLR448W	FHL1 , RPL6B
Fhl1	YLL045C	FHL1 , FKH1 , ACE2 , RME1 , SPT2 , MSN4 , RPN4 , RPL8B
Fhl1	YDR501W	FHL1 , FKH1 , ACE2 , RME1 , SPT2 , MSN4 , MSN2 , STP2 , PLM2
[truncated: 5,260 more rows]
